# Supplementary material for: IDO1 plays a tumor-promoting role via MDM2-mediated suppression of the p53 pathway in diffuse large B-cell lymphoma
Source: PubMed Central journal article supplement (PMC9237101; doi:10.1038/s41419-022-05021-2), 2022-06-27

**Figure 3C:** WB results.  
Repeat 1

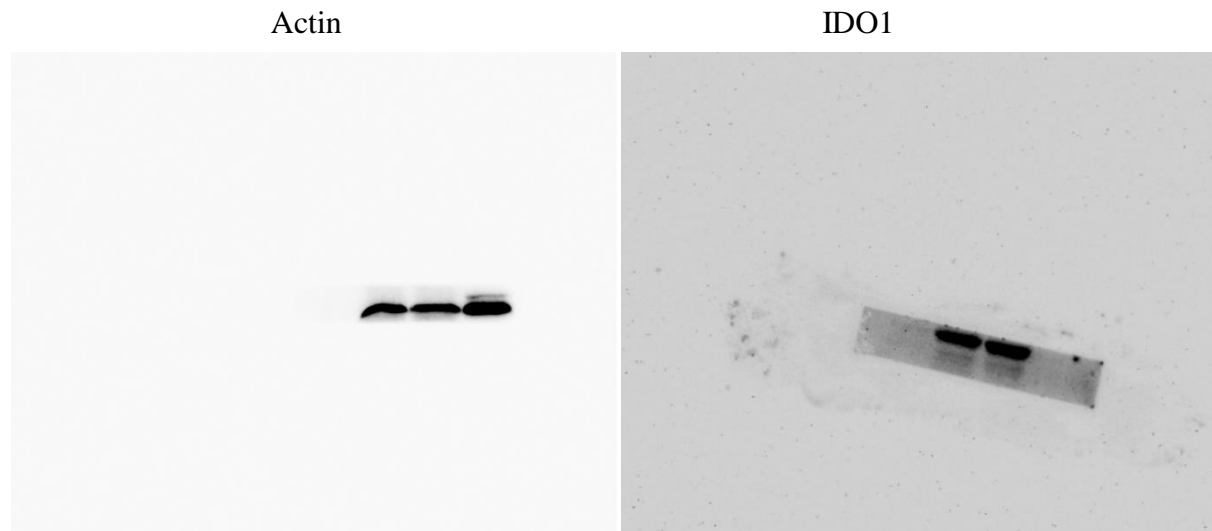

**Figure 3C:** WB results.  
Repeat 2

Actin

IDO1

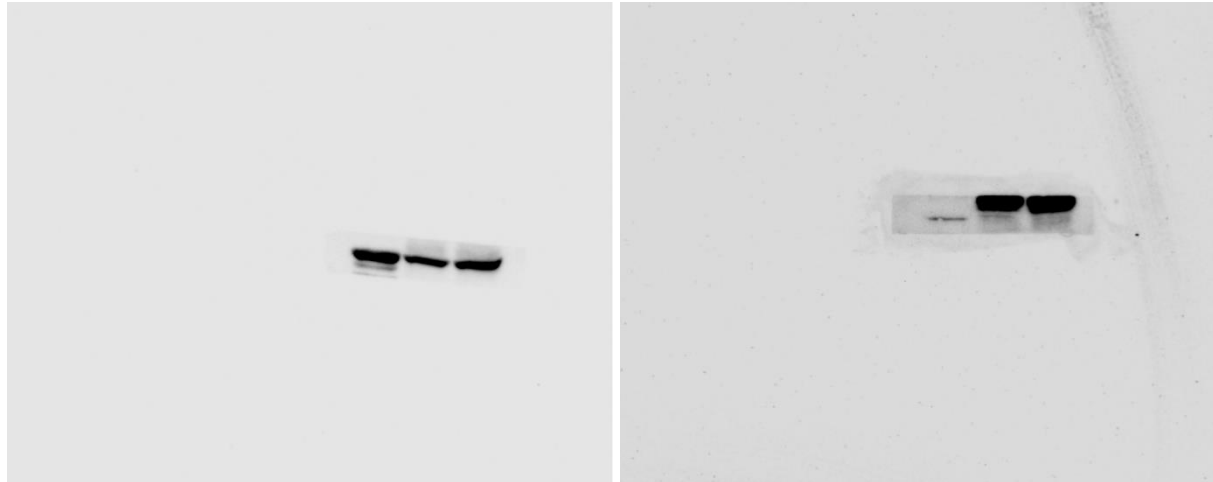

**Figure 3C:** WB results.  
Repeat 3

Actin

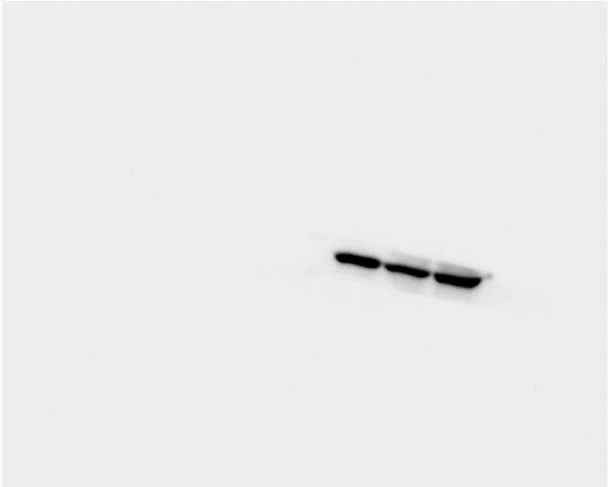

IDO1

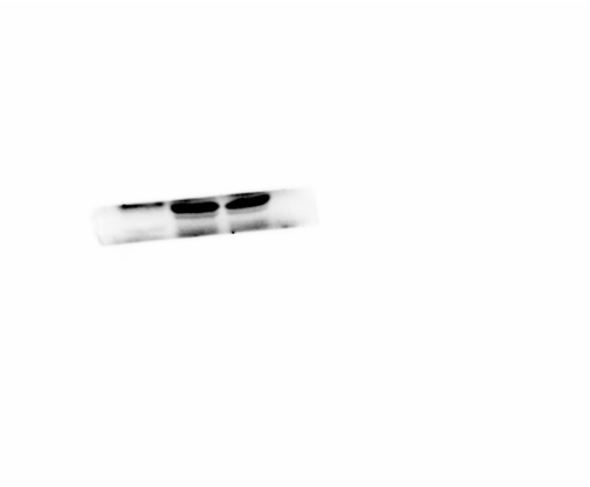

**Figure 6C:** WB results  
Repeat 1

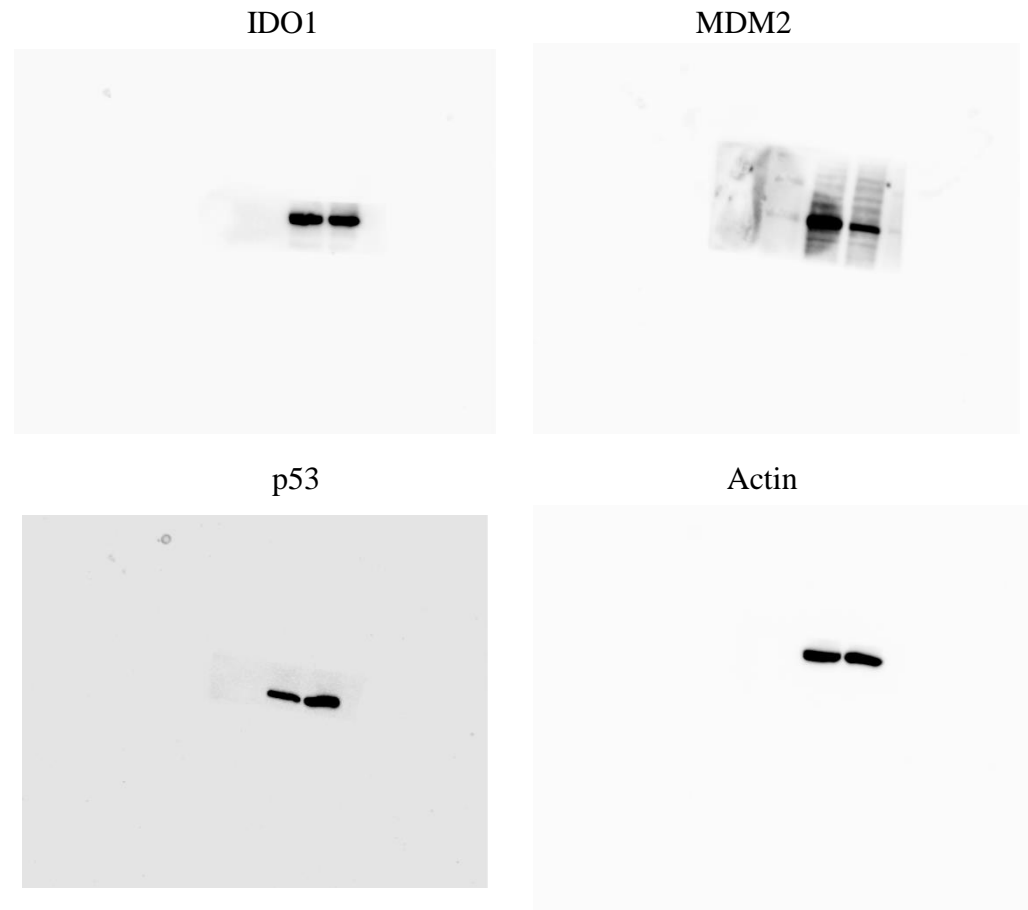

**Figure 6C:** WB results  
Repeat 2

IDO1

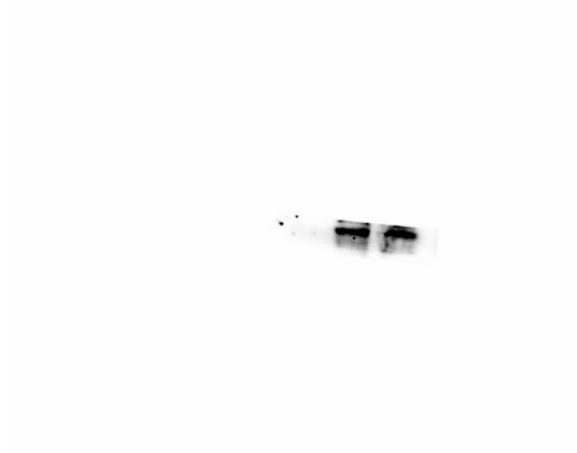

MDM2

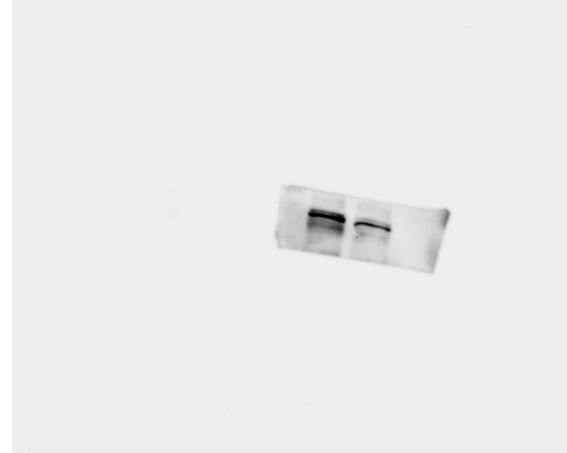

p53

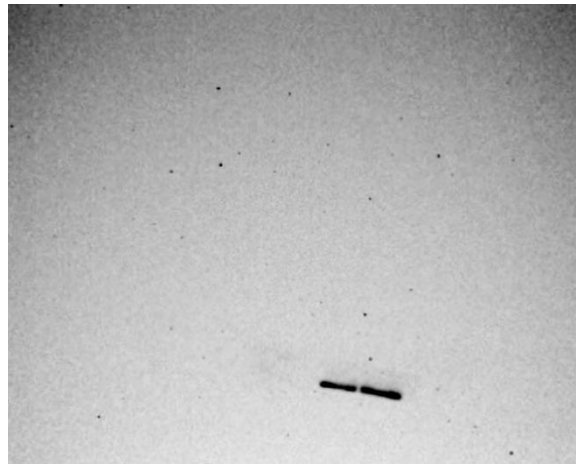

Actin

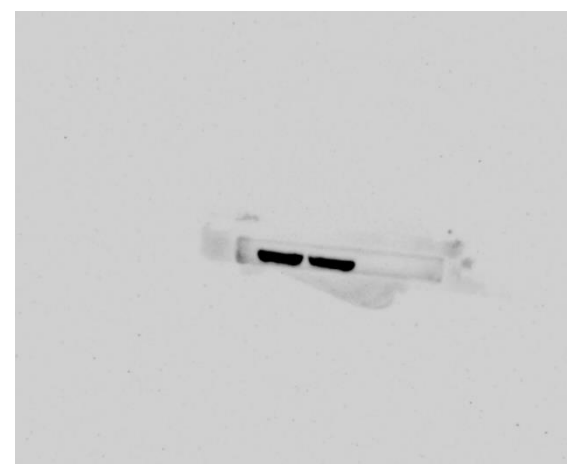

**Figure 6C:** WB results  
Repeat 3

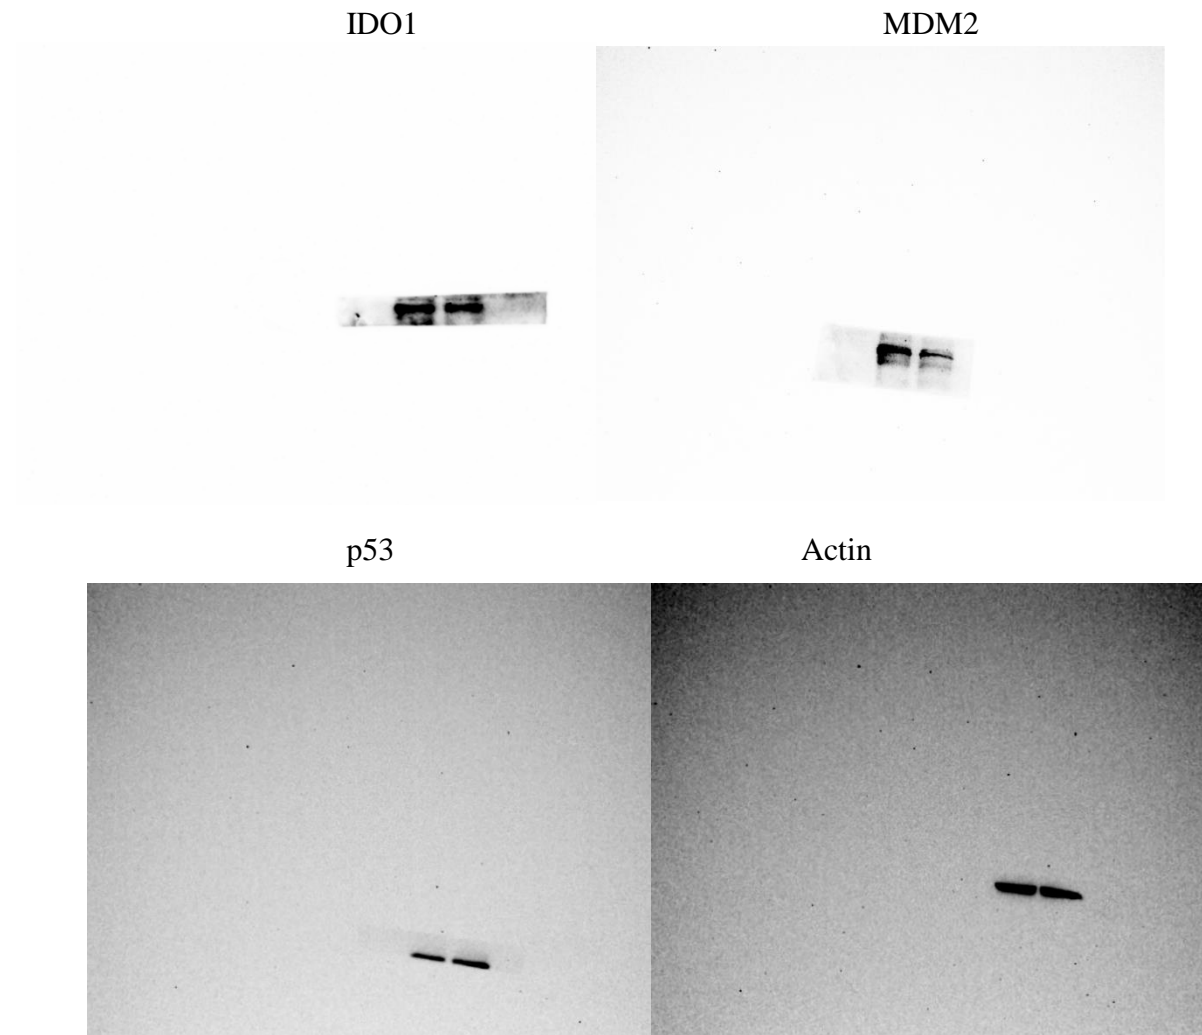

**Figure 6D:** WB results  
Repeat 1

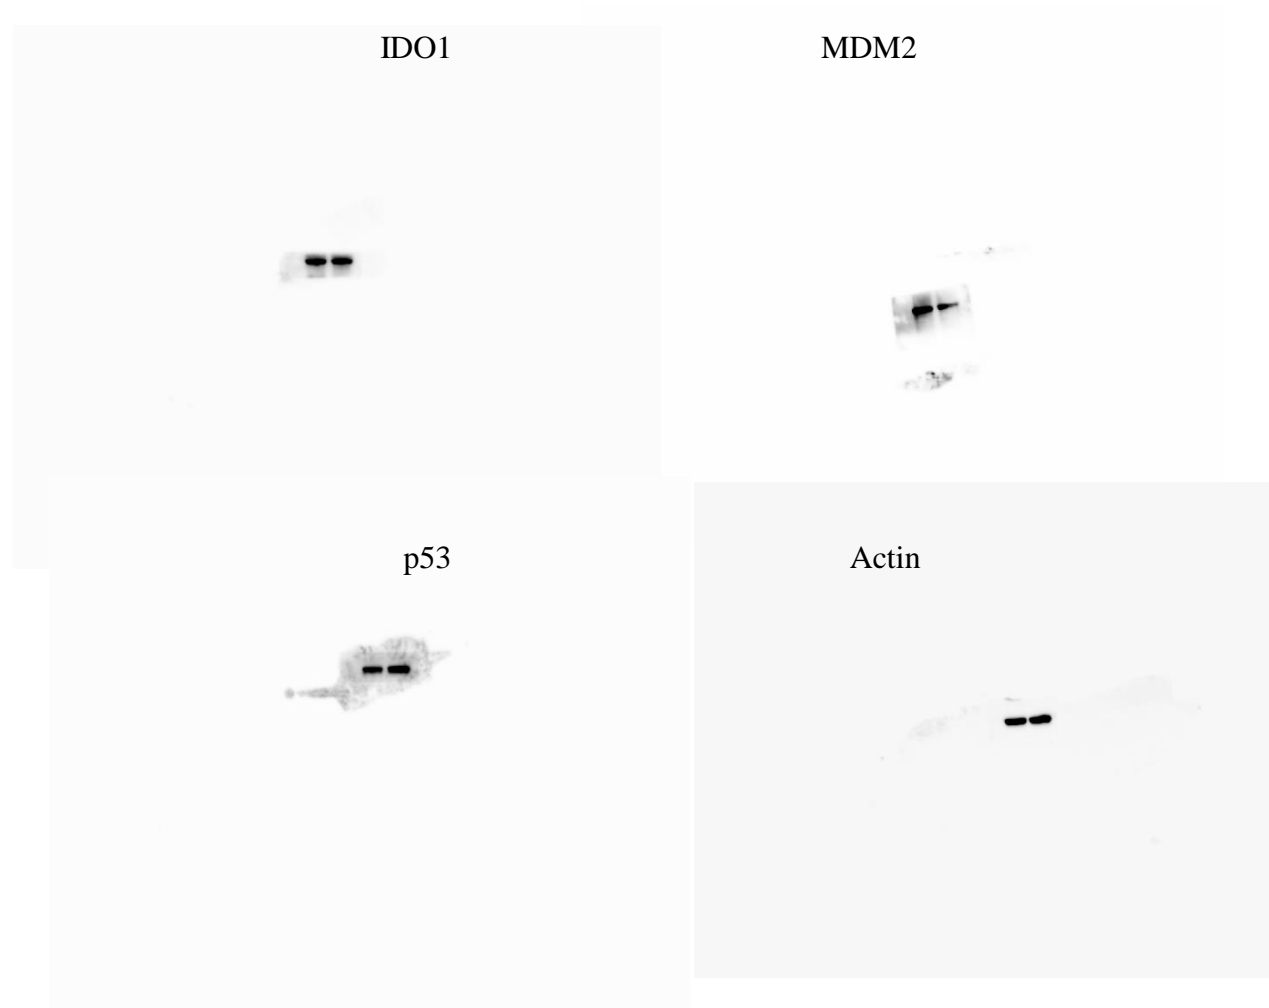

**Figure 6D:** WB results  
Repeat 2

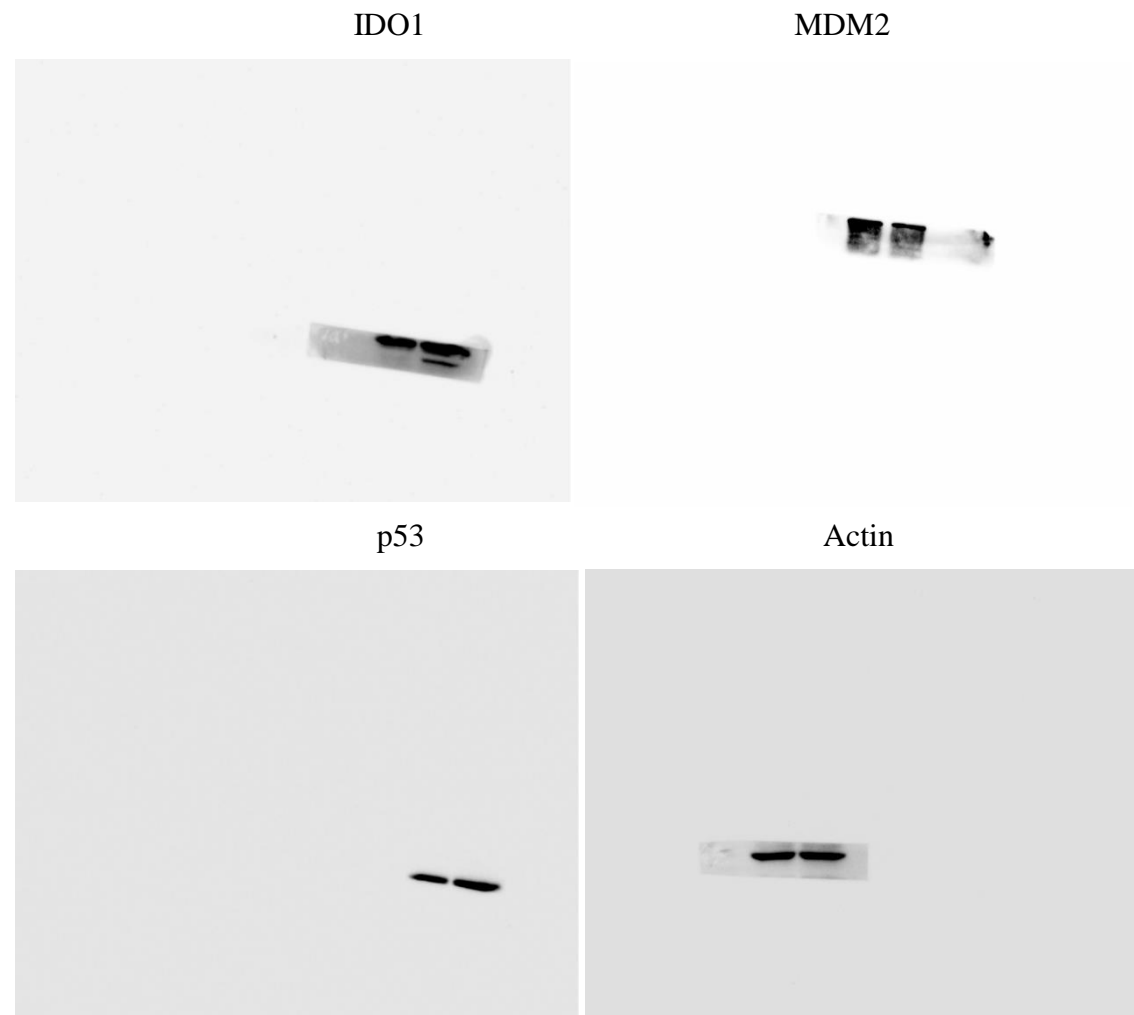



**Figure 6D:** WB results  
Repeat 3

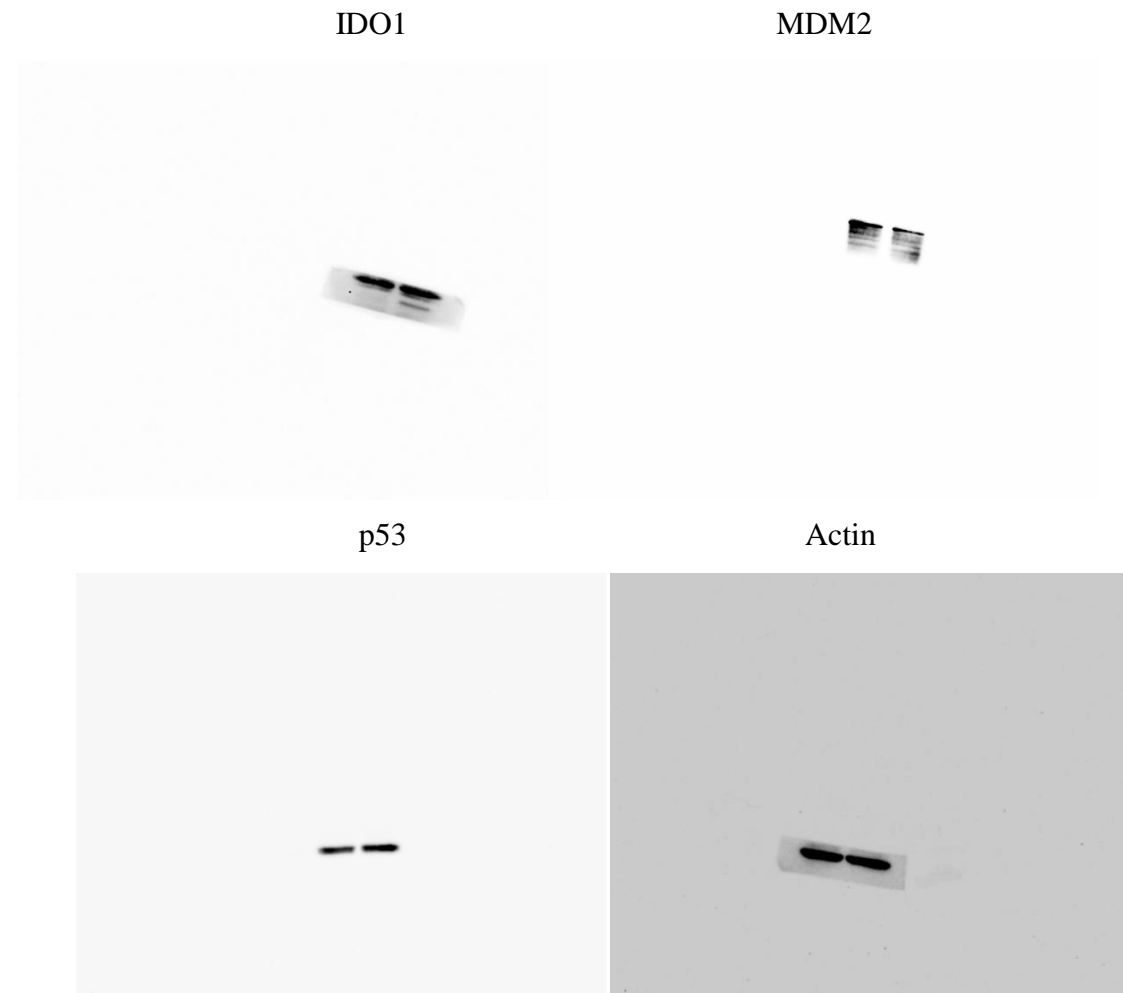

**Figure 6E:** WB results  
Repeat 1

IDO1

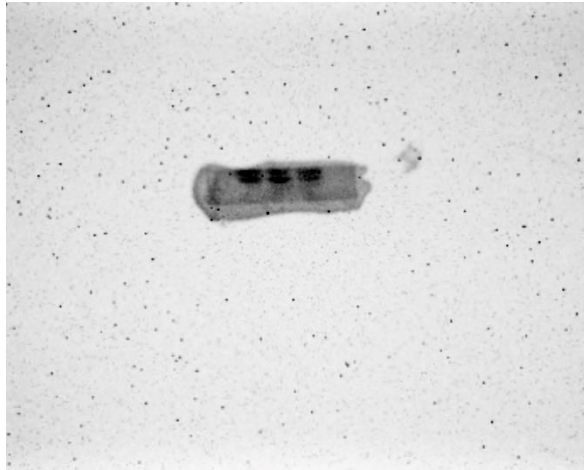

MDM2

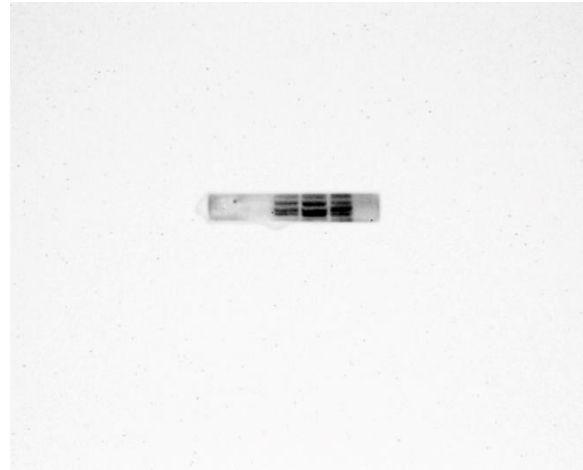

p53

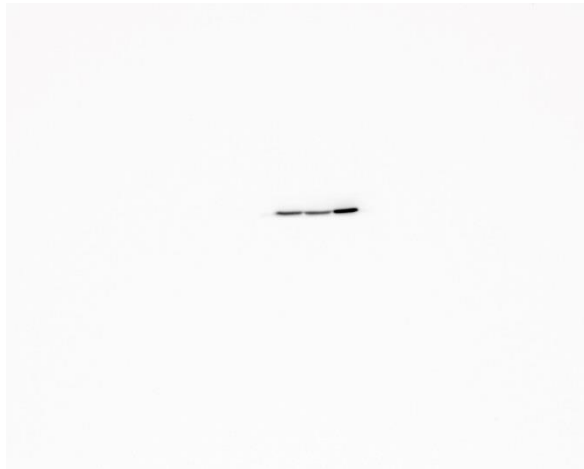

Actin

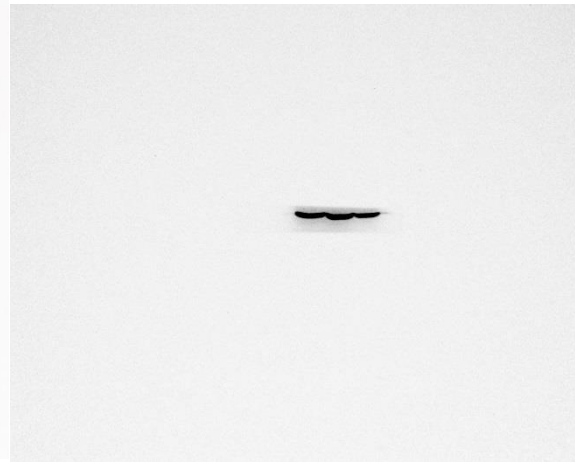

**Figure 6E:** WB results  
Repeat 2

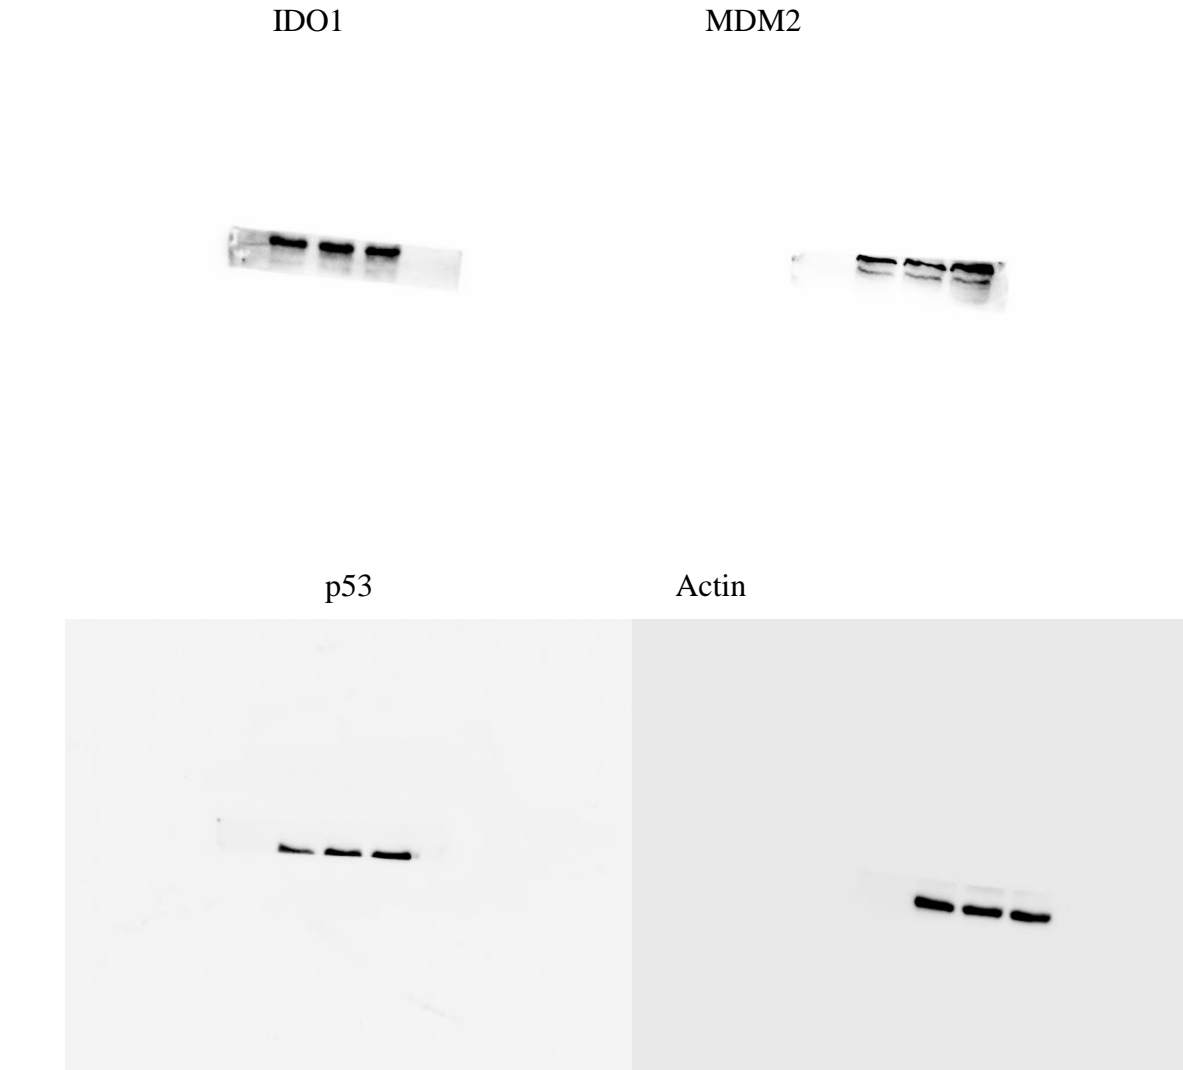

**Figure 6E:** WB results

Repeat 3

IDO1

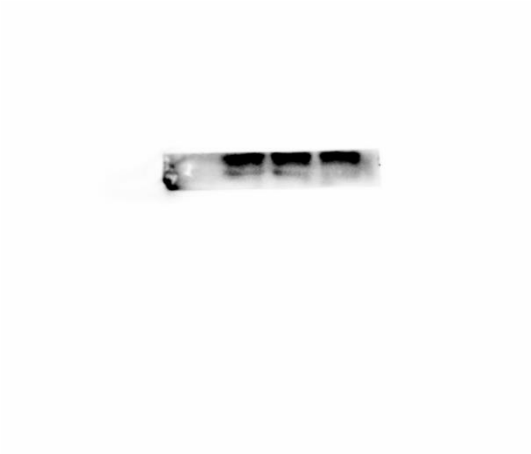

MDM2

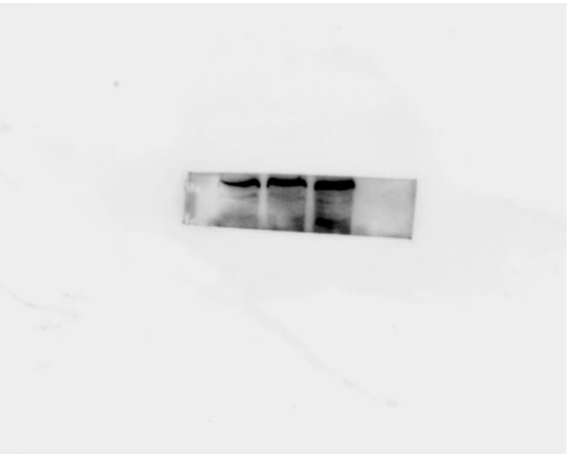

p53

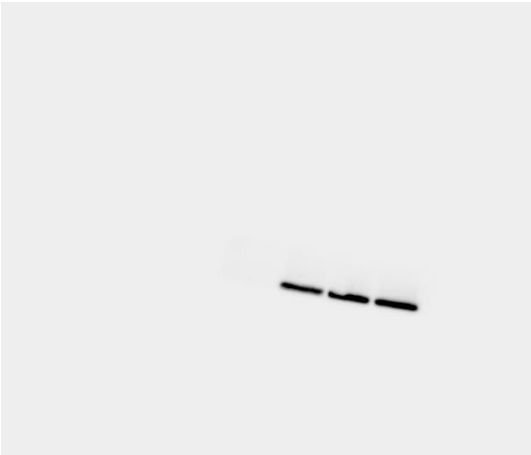

Actin

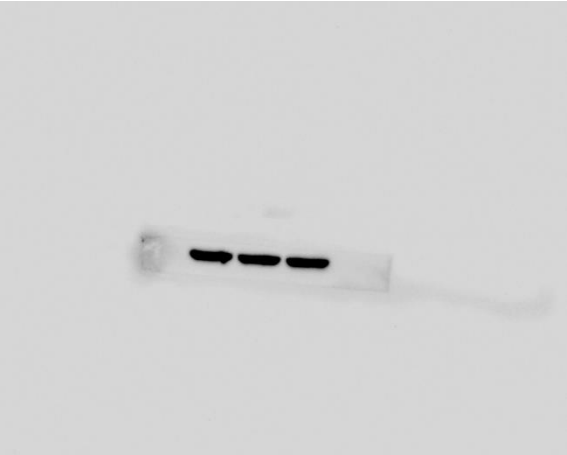

**Figure 6F:** WB results  
Repeat 1

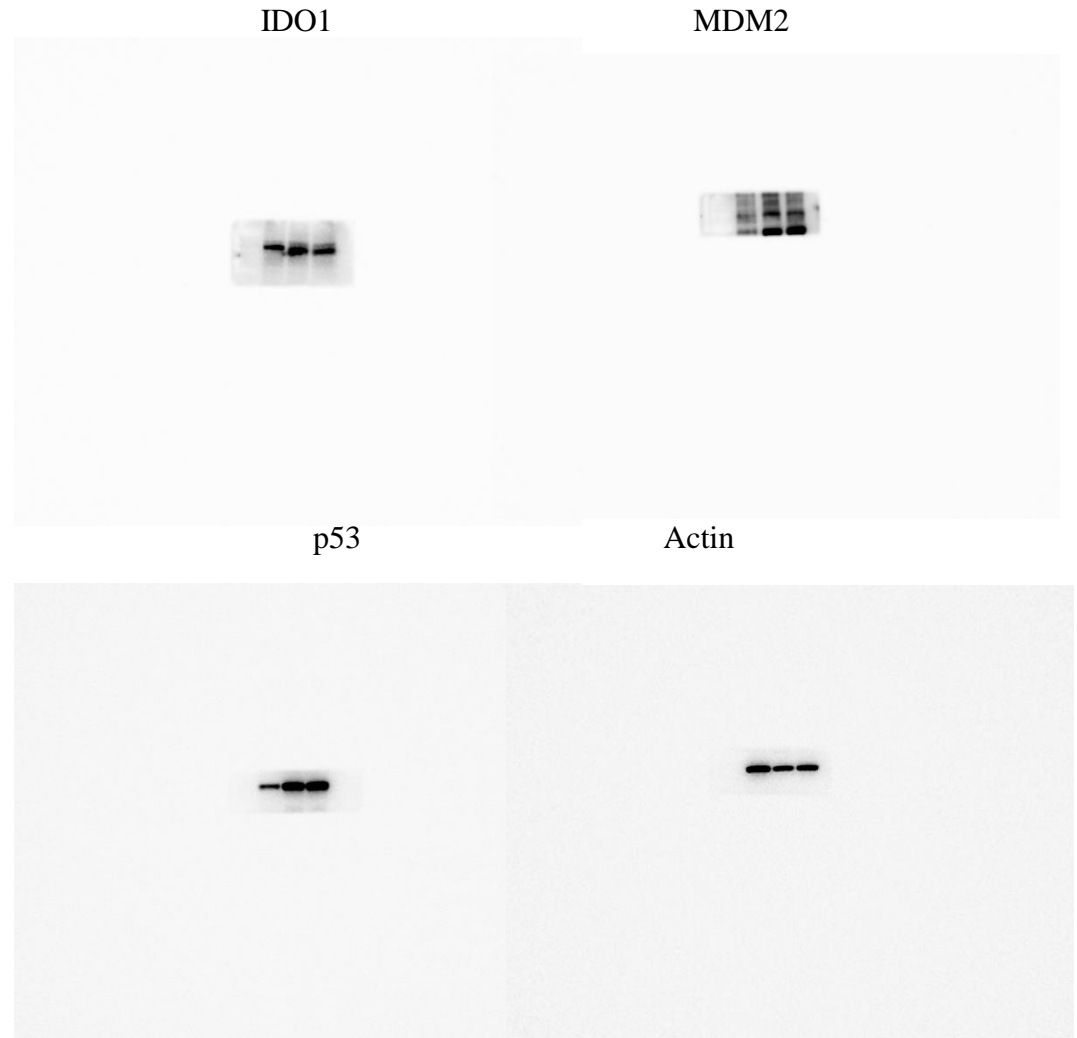

**Figure 6F:** WB results  
Repeat 2

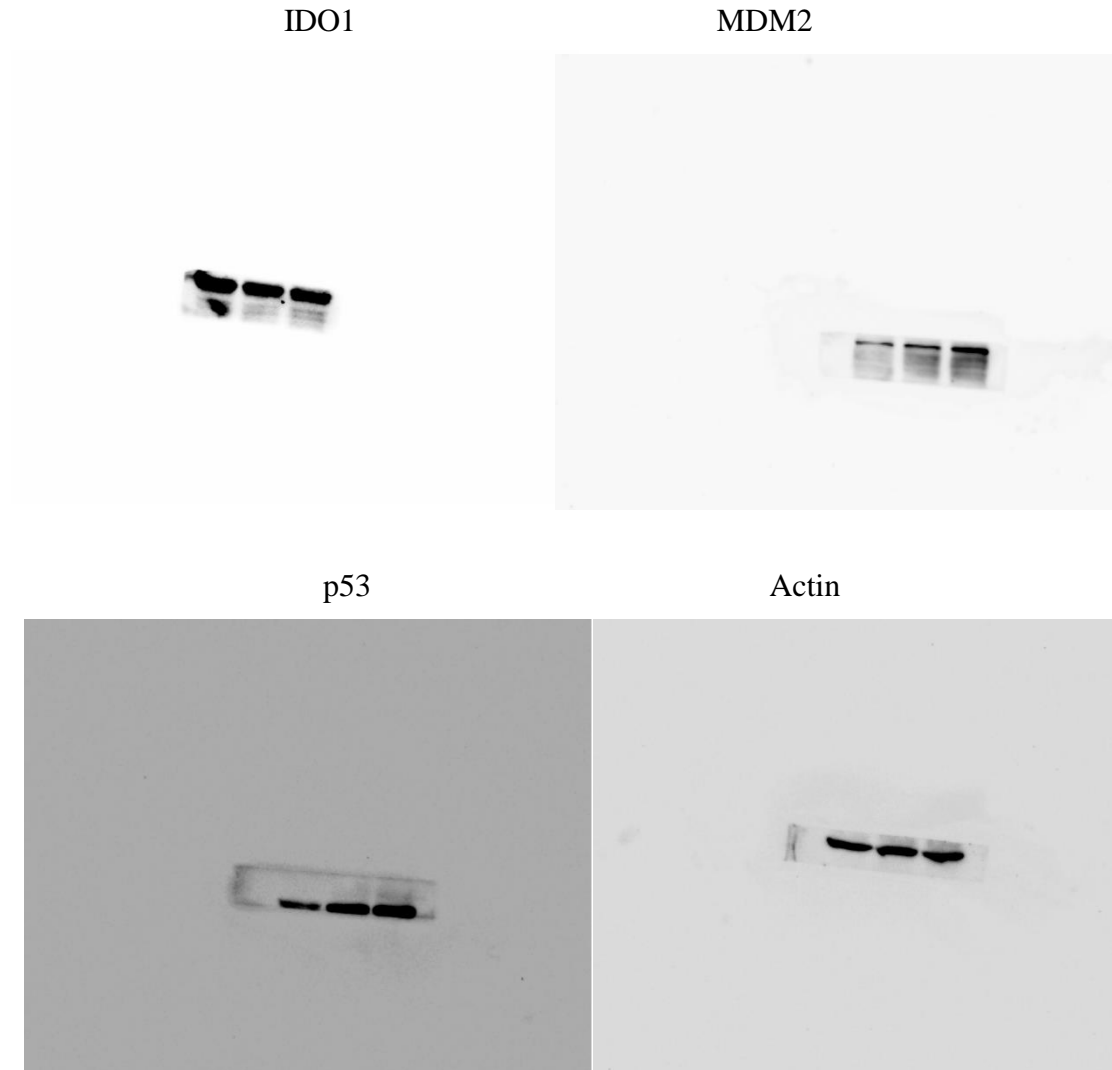

**Figure 6F:** WB results  
Repeat 3

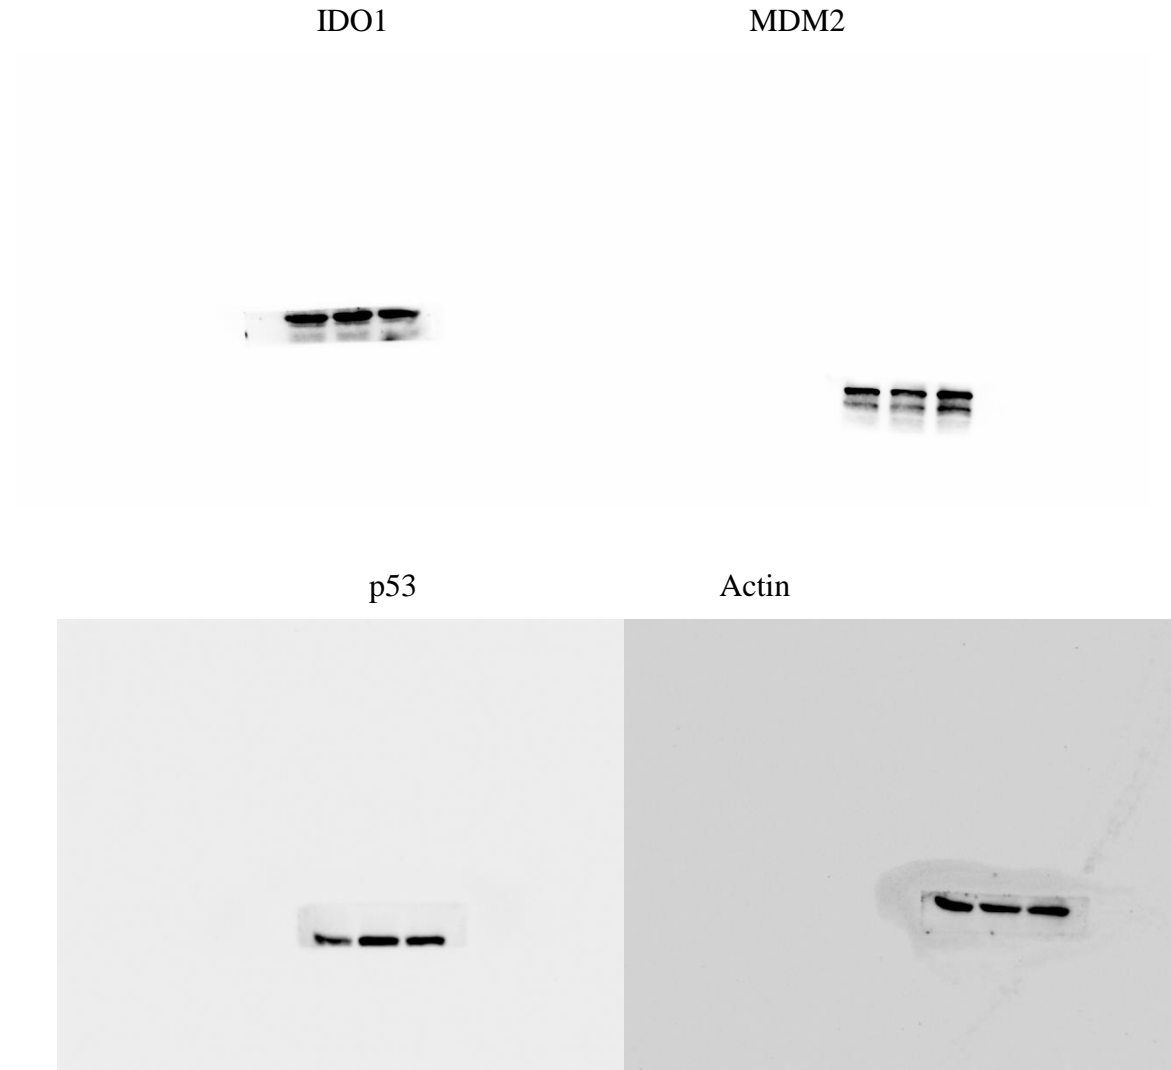

**Figure 6G:** WB results  
Repeat 1

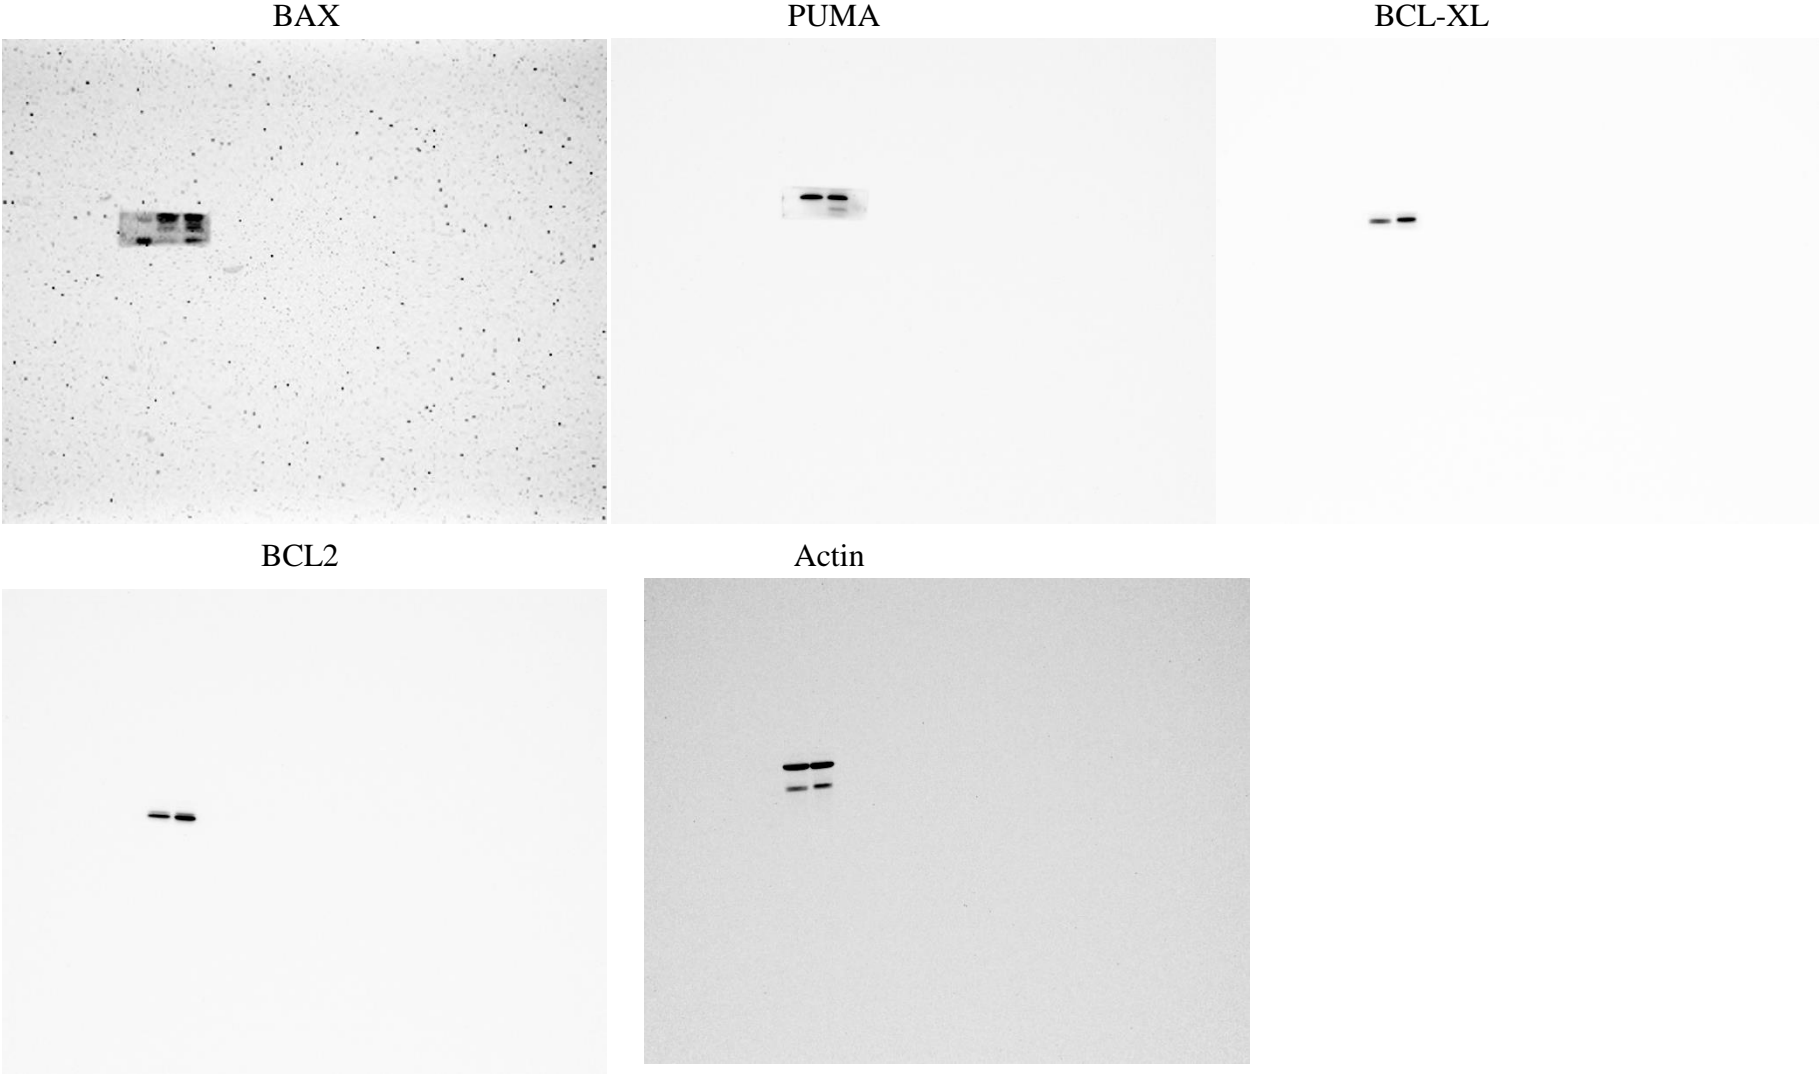



**Figure 6G:** WB results  
Repeat 2

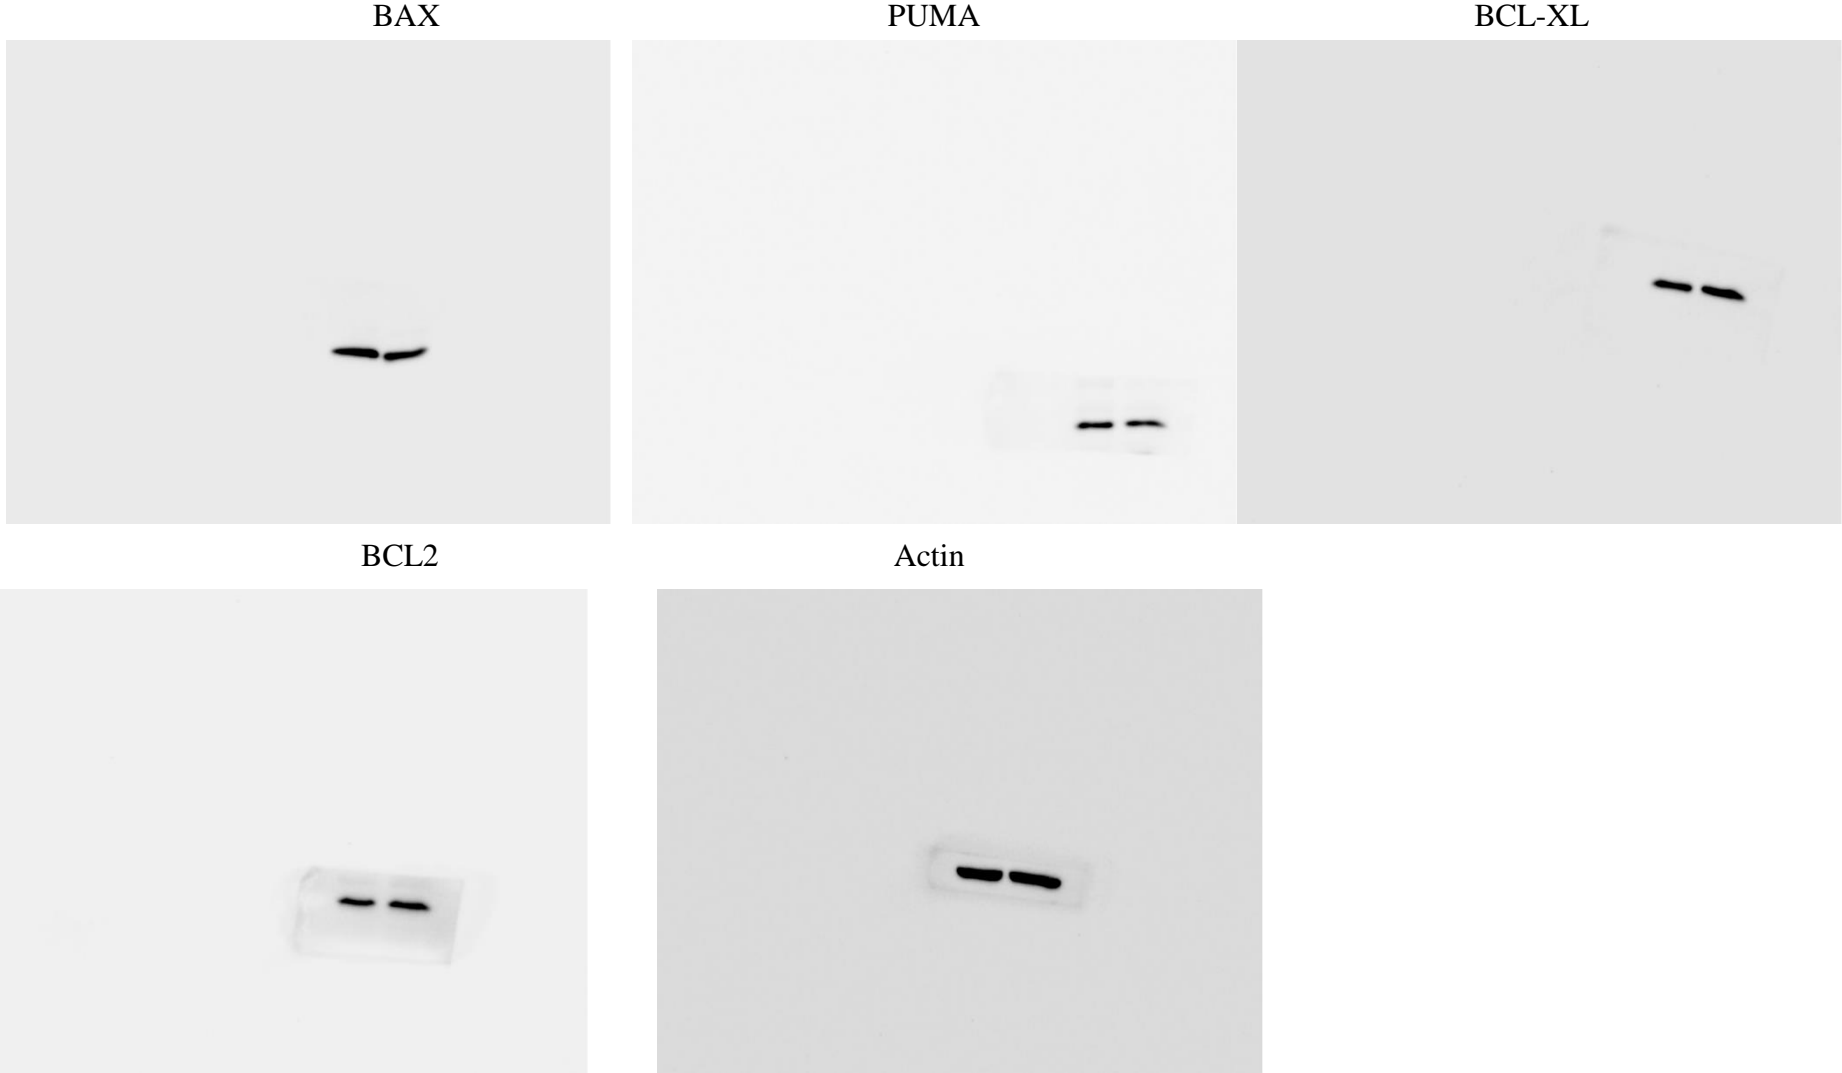

**Figure 6G:** WB results  
Repeat 3

BAX

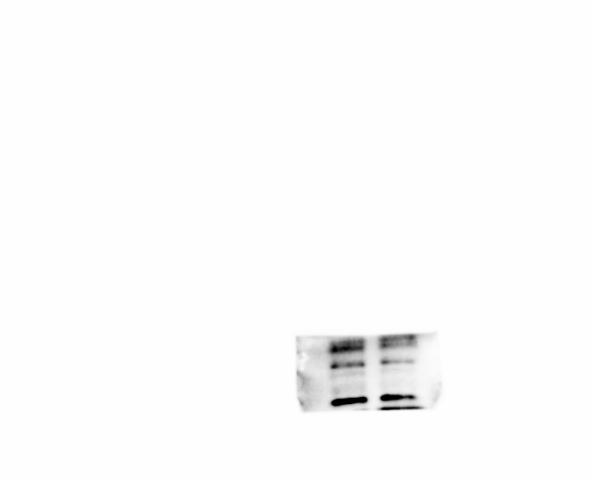

PUMA

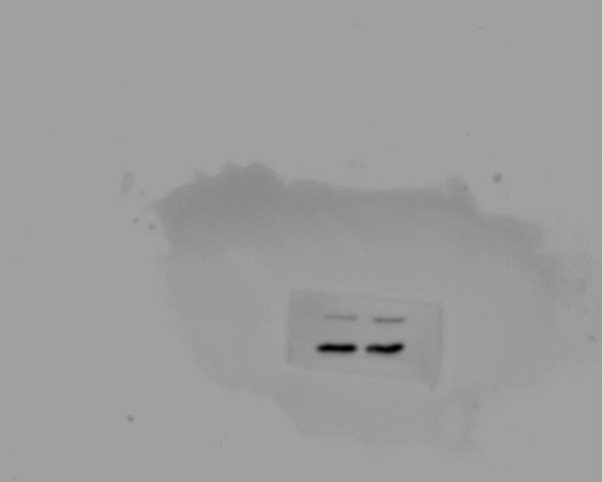

BCL-XL

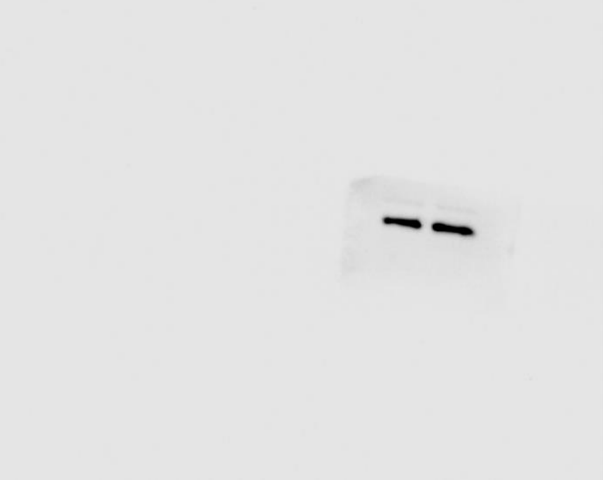

BCL2

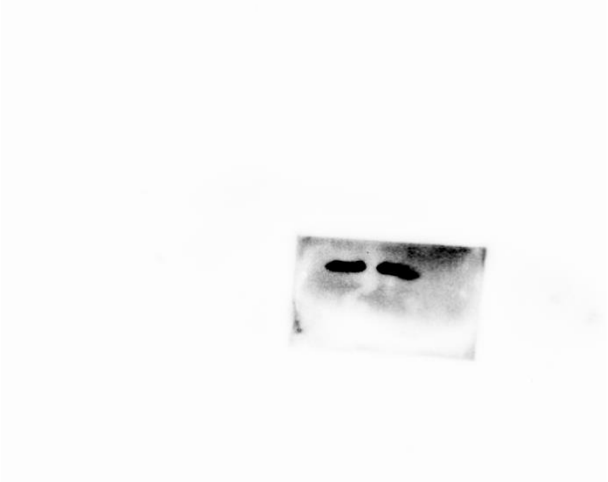

Actin

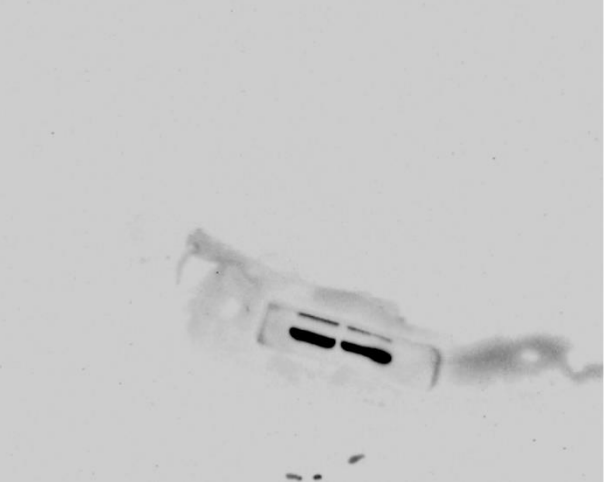

**Figure 6H:** WB results  
Repeat 1

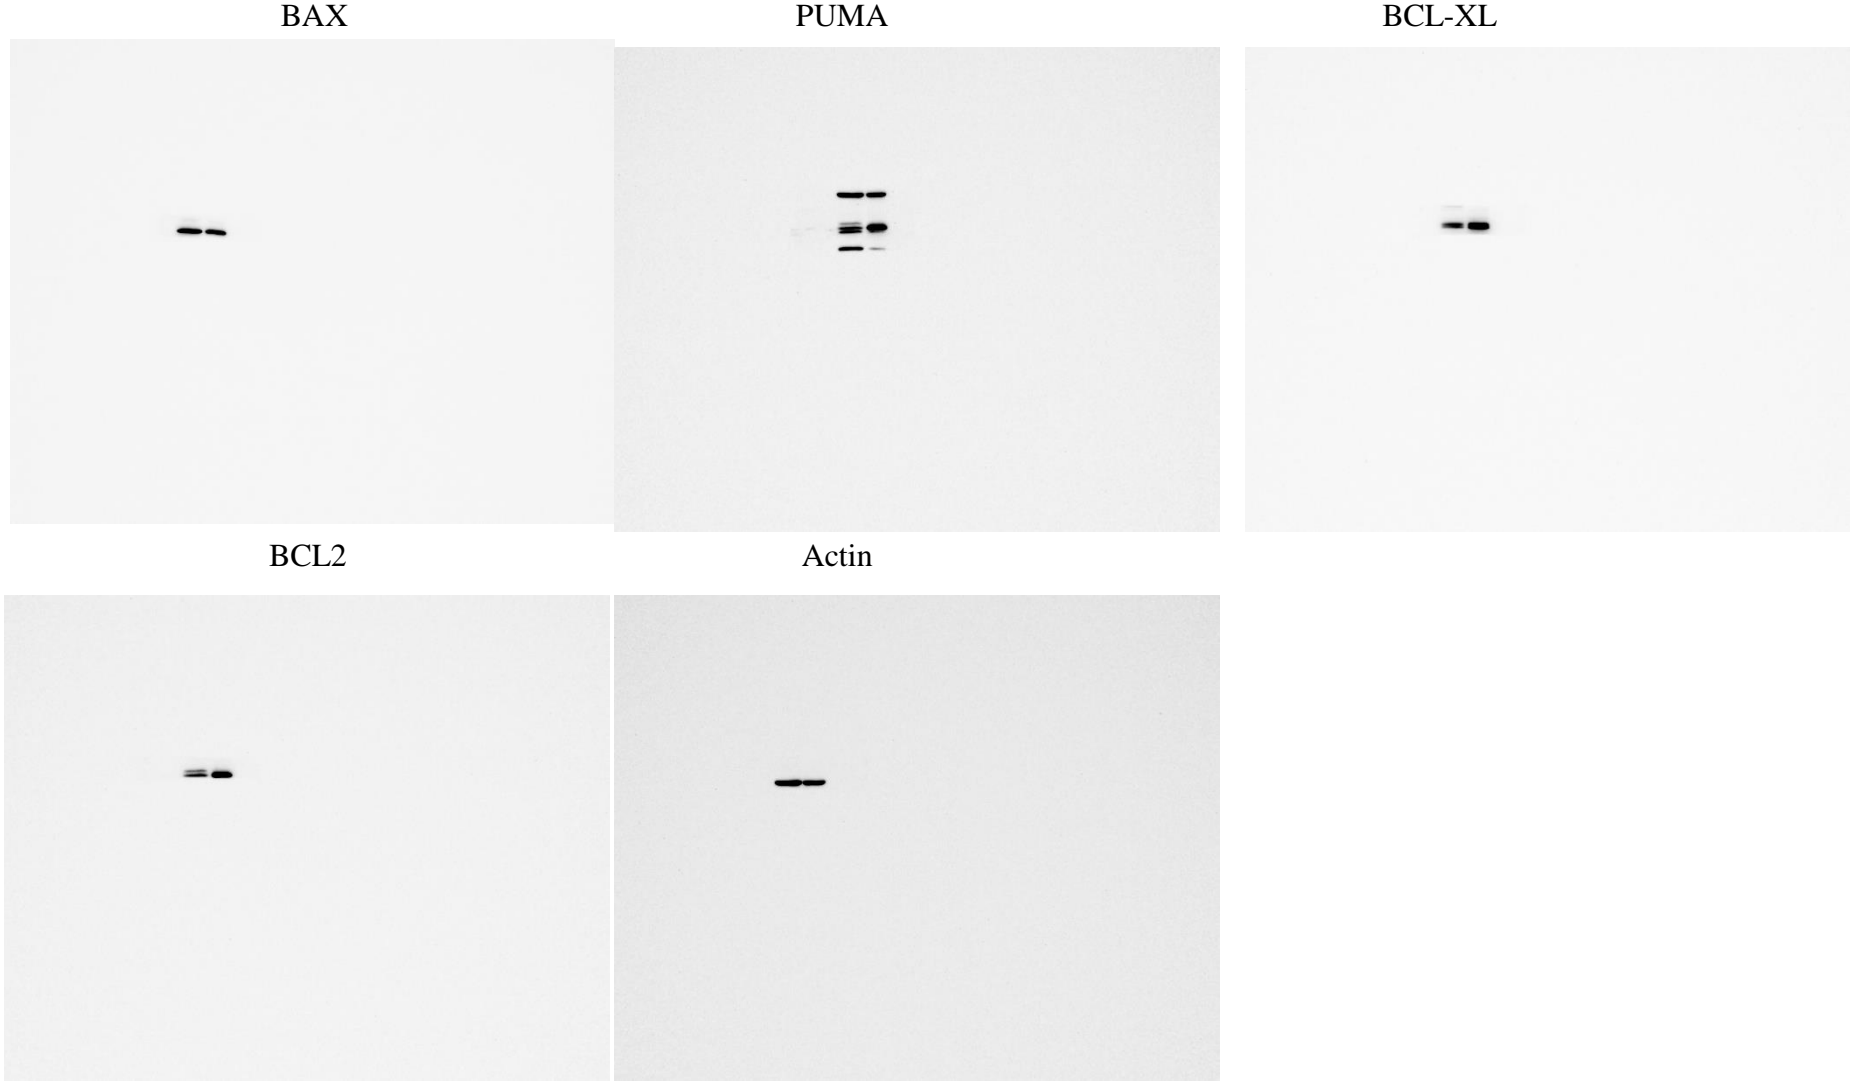

**Figure 6H:** WB results  
Repeat 2

BAX

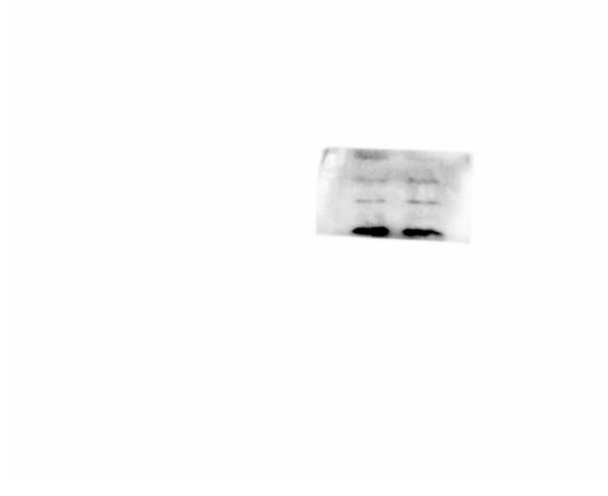

PUMA

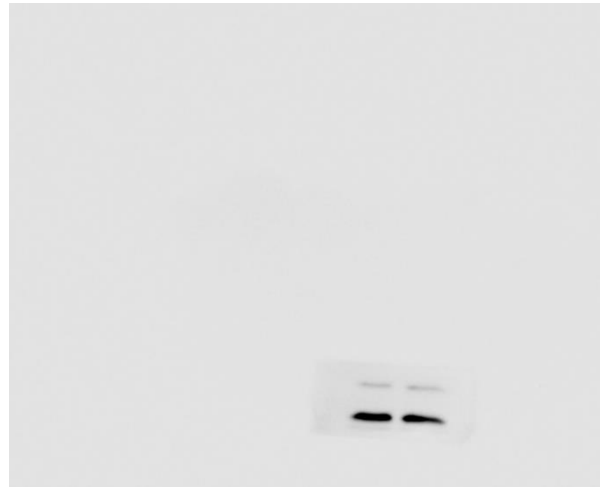

BCL-XL

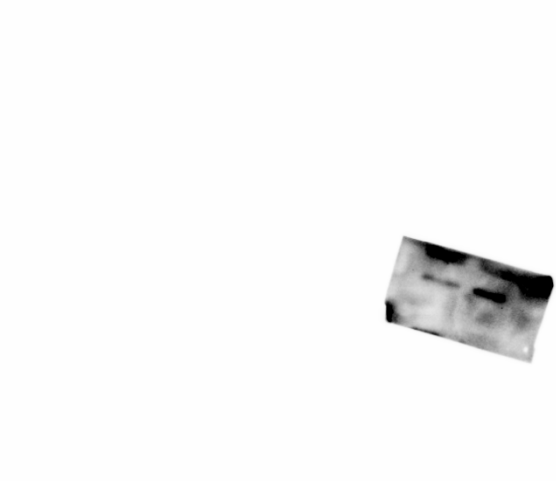

BCL2

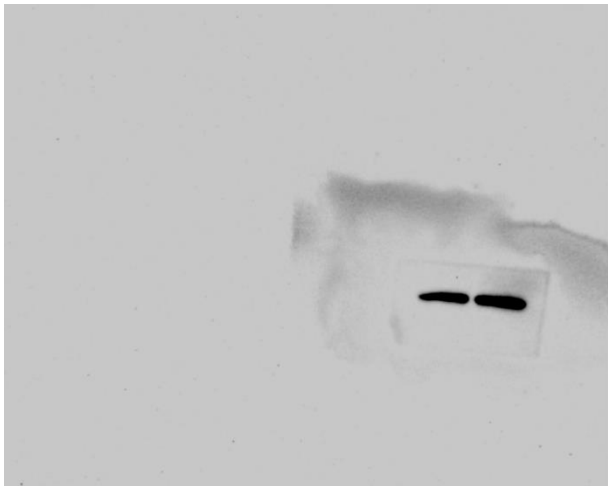

Actin

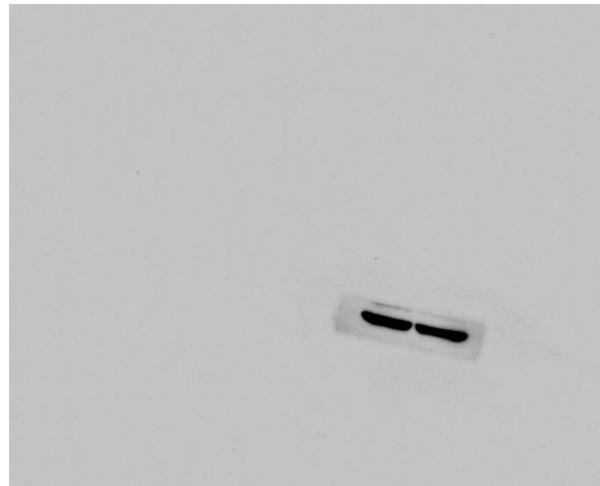

**Figure 6H:** WB results  
Repeat 3

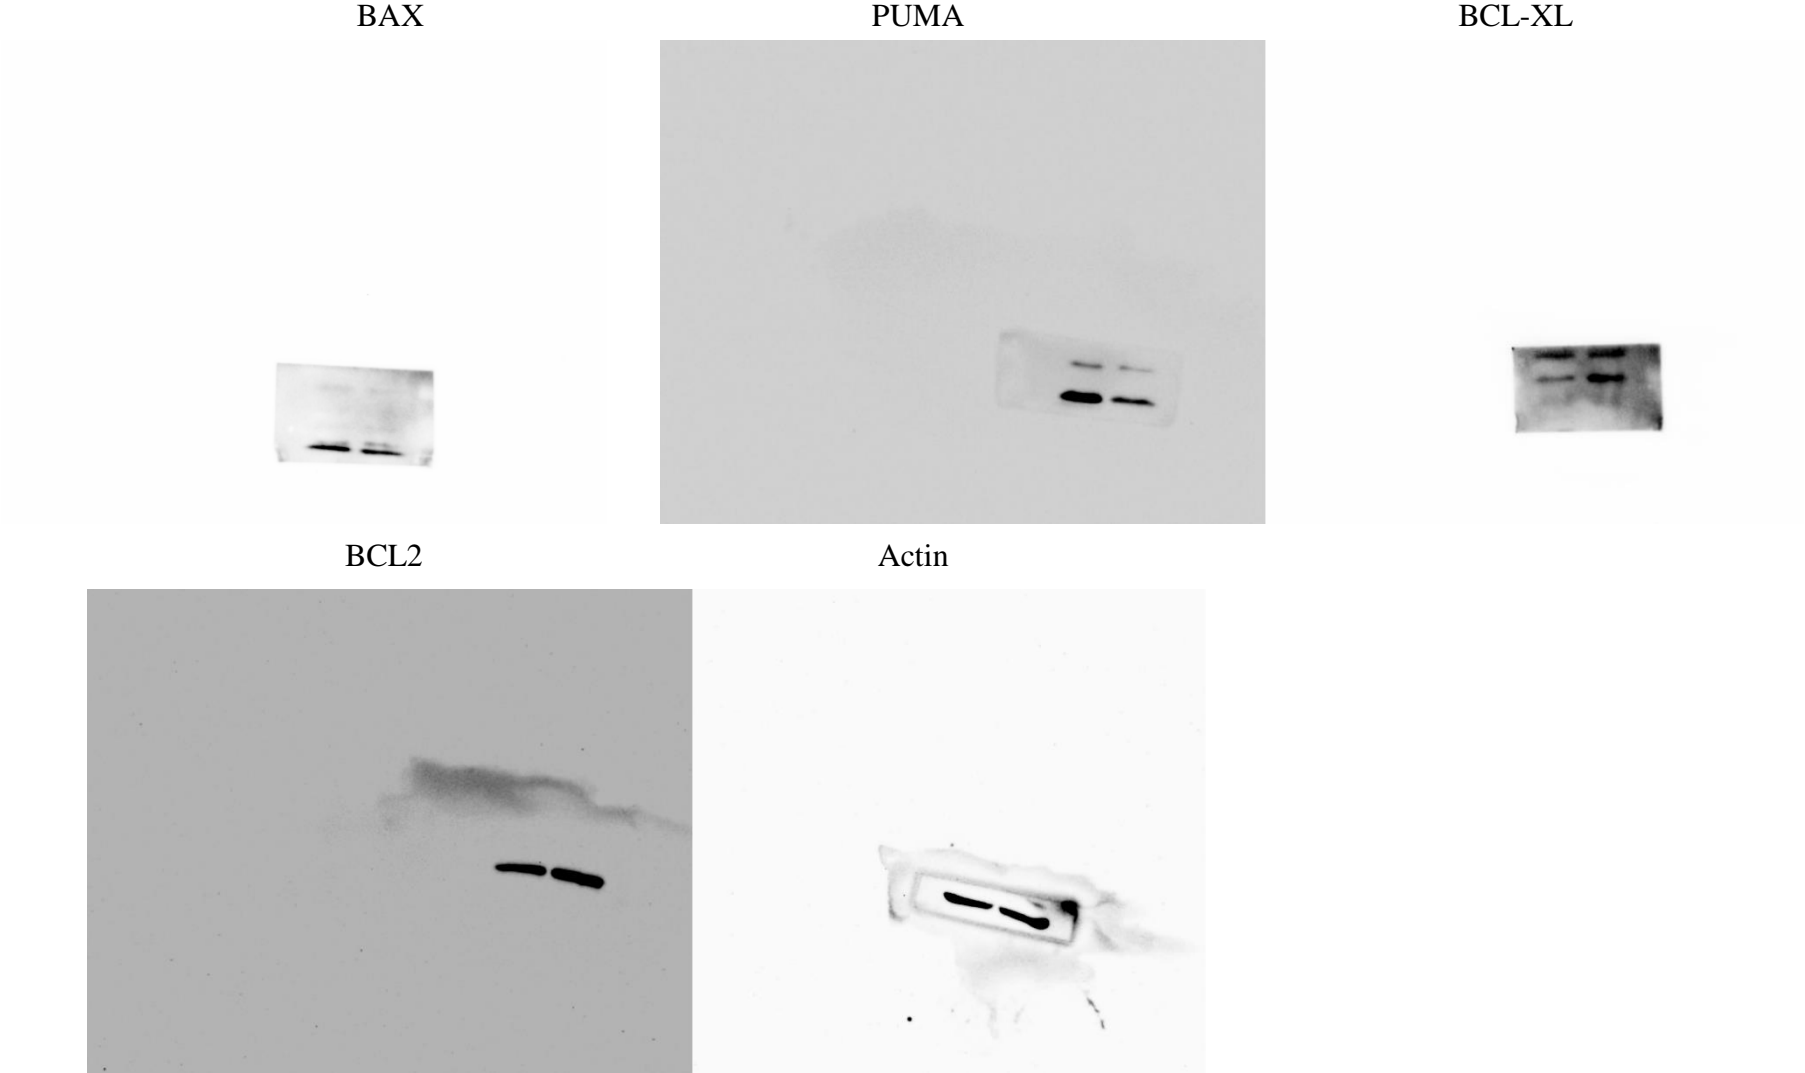

**Figure 6J:** WB results  
Repeat 1

p53

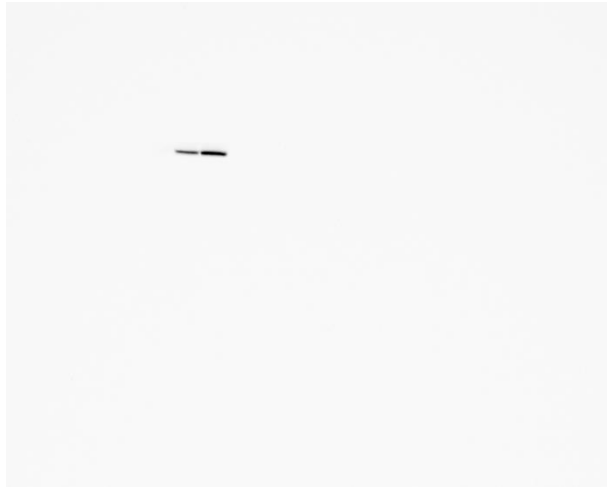

p21

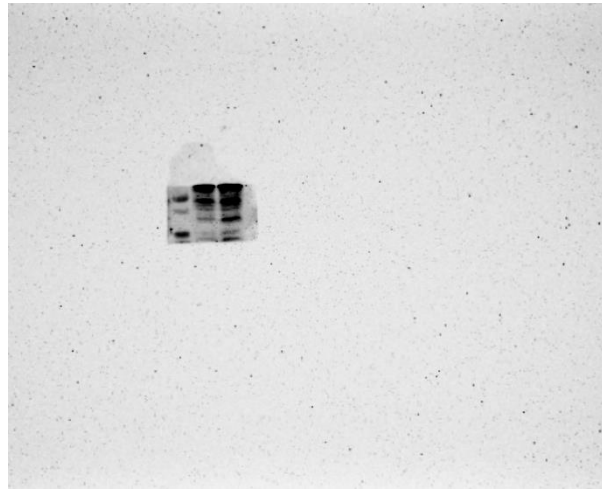

Actin

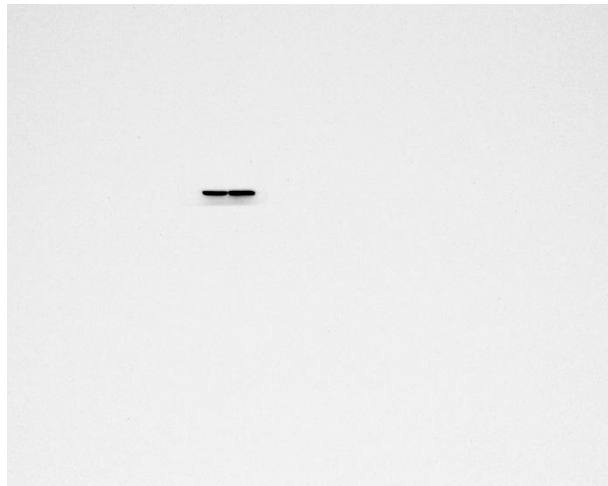

**Figure 6J:** WB results  
Repeat 2

p53

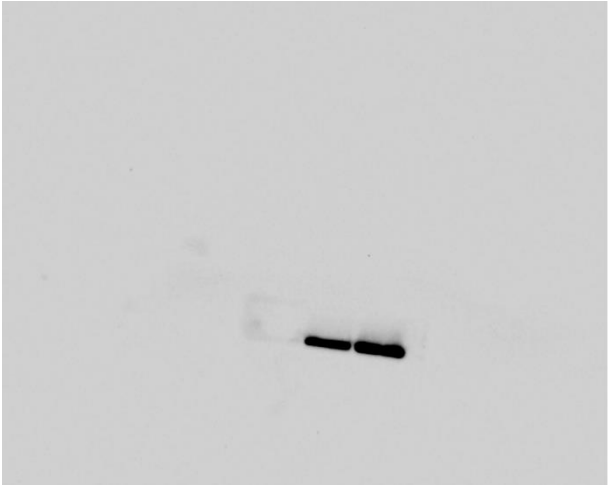

p21

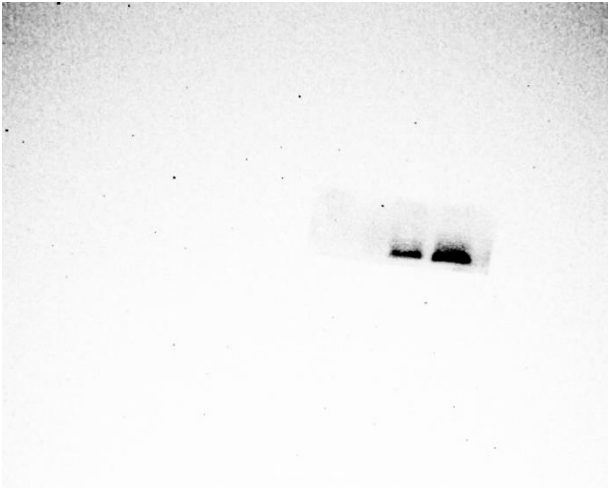

Actin

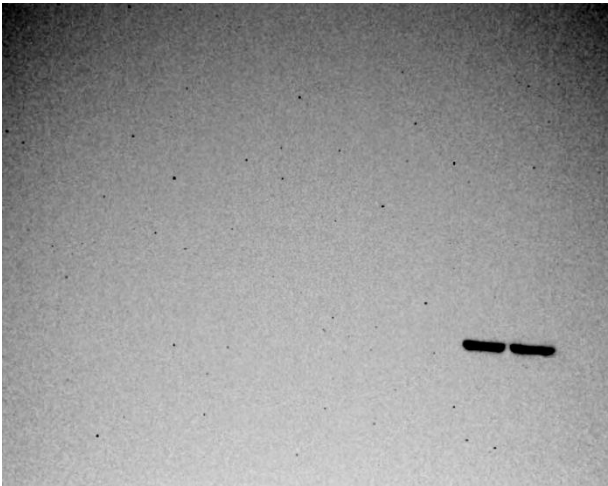

**Figure 6J:** WB results  
Repeat 3

p53

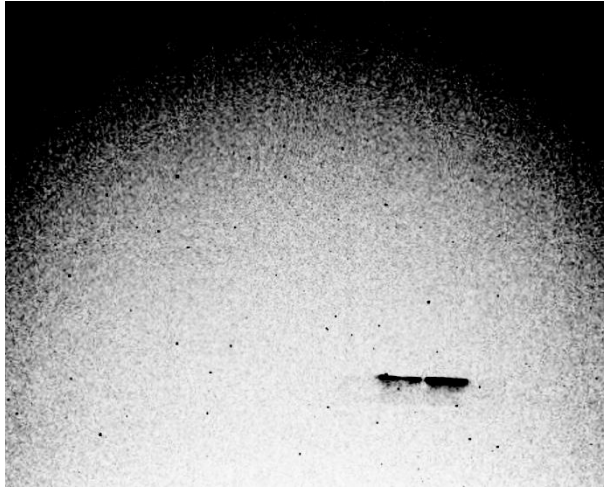

p21

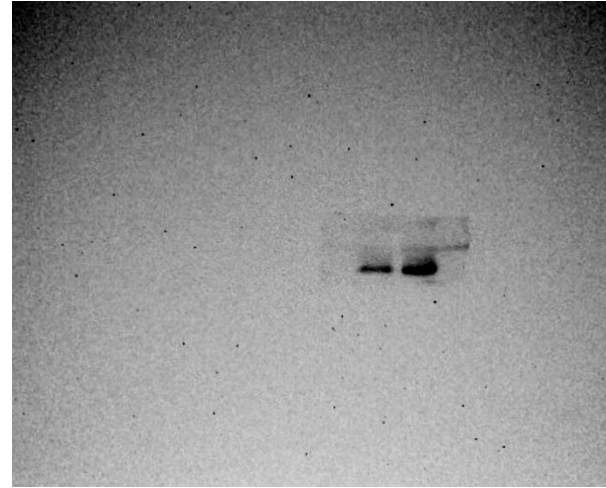

Actin

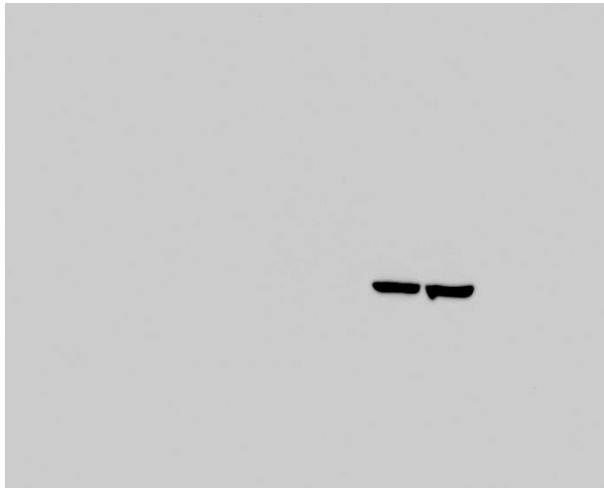



**Figure 6K:** WB results  
Repeat 1

p53

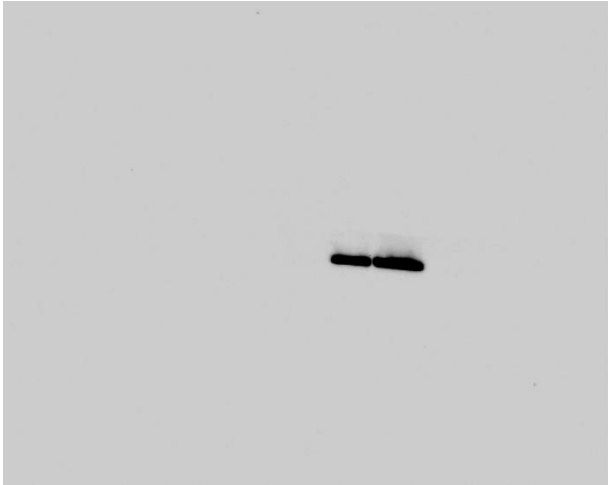

p21

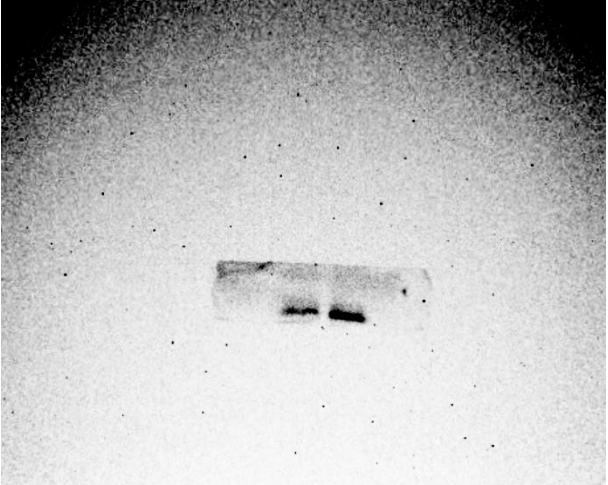

Actin

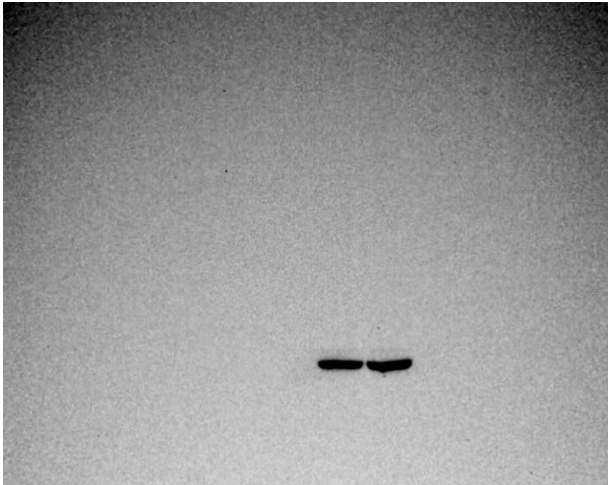

**Figure 6K:** WB results  
Repeat 2

p53

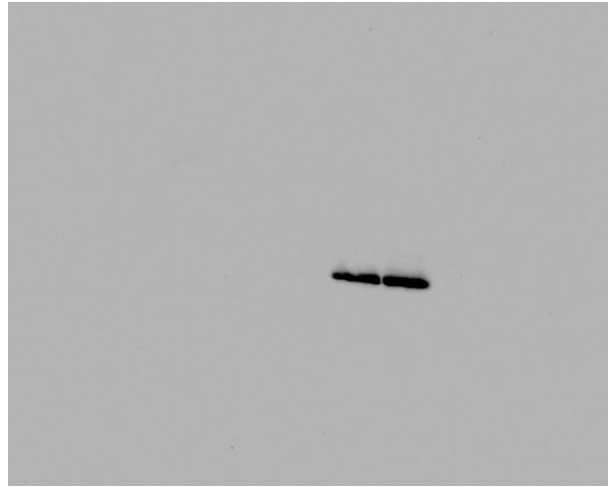

p21

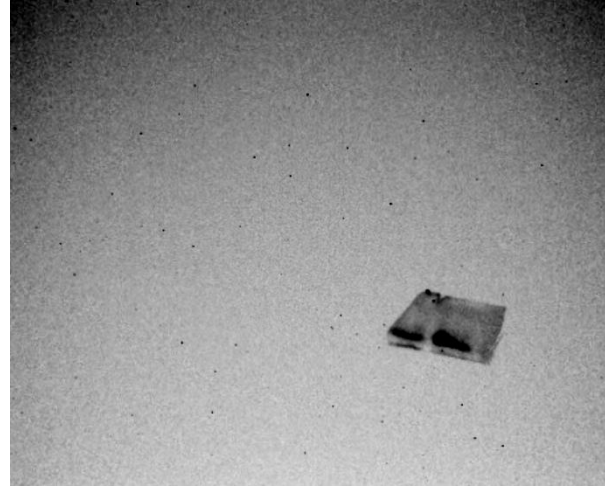

Actin

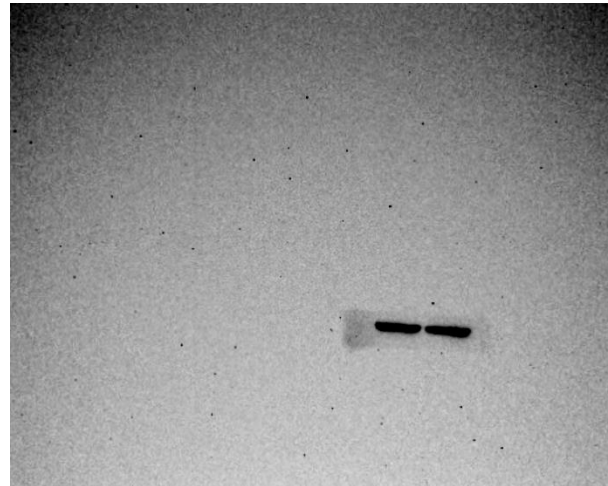

**Figure 6K:** WB results  
Repeat 3

p53

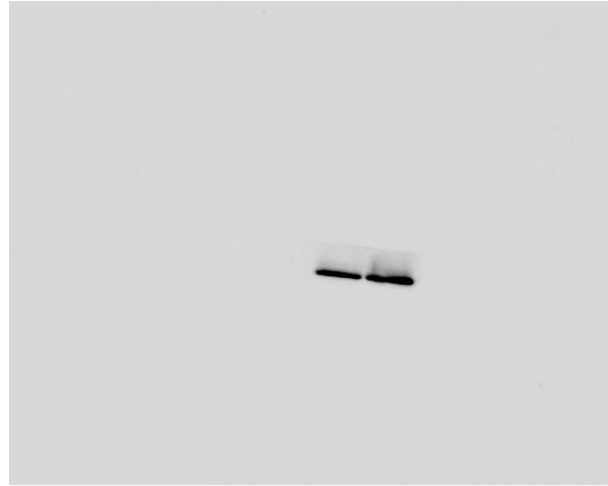

p21

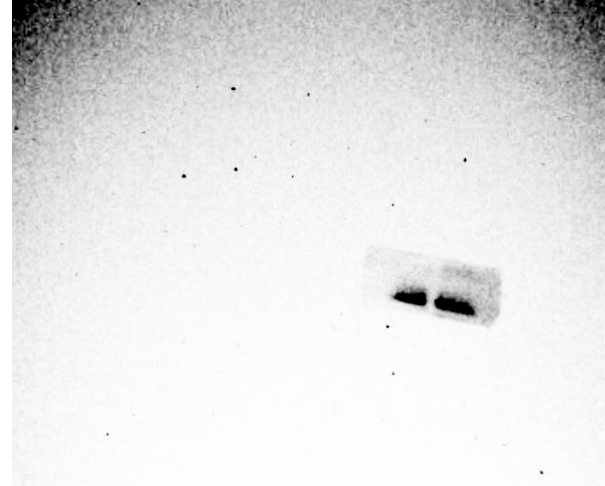

Actin

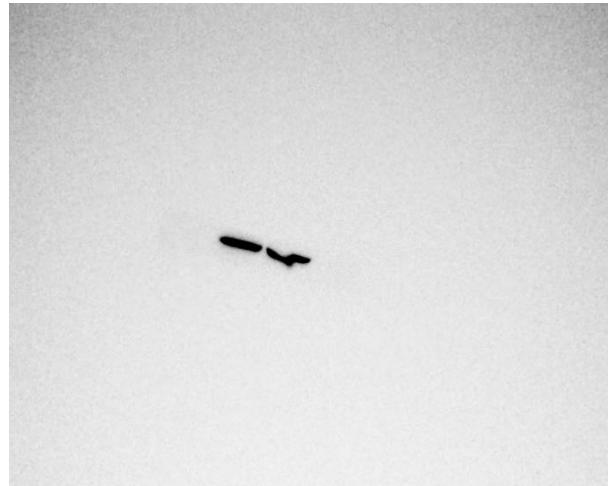

**Supplementary Figure S2E: WB results**

Repeat 1

IDO1

MDM2

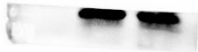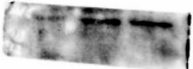

p53

Actin

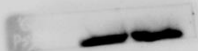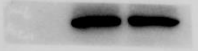

**Supplementary Figure S2E: WB results**  
Repeat 2

IDO1

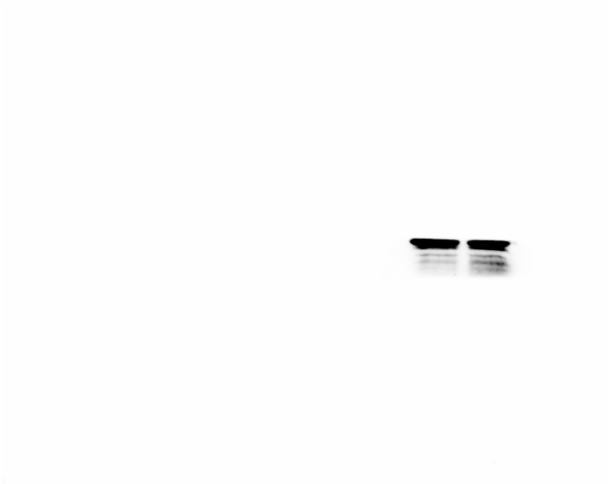

MDM2

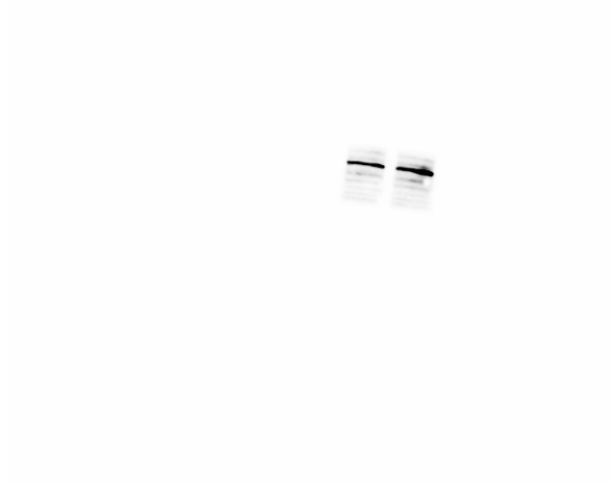

p53

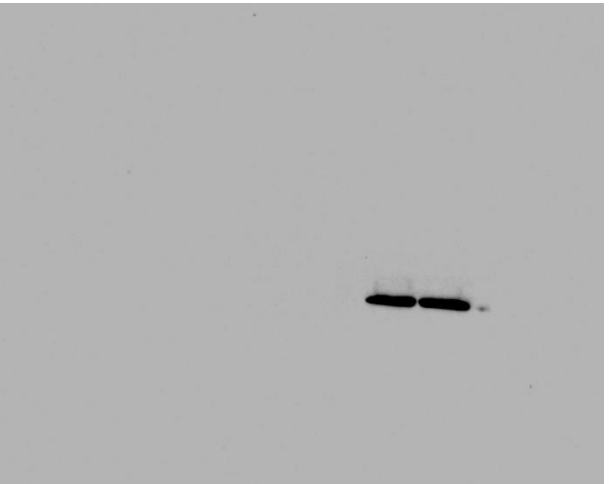

Actin

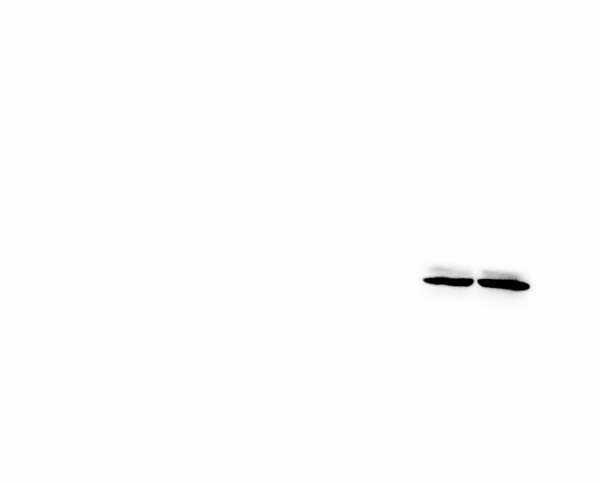

**Supplementary Figure S2E: WB results**

Repeat 3

IDO1

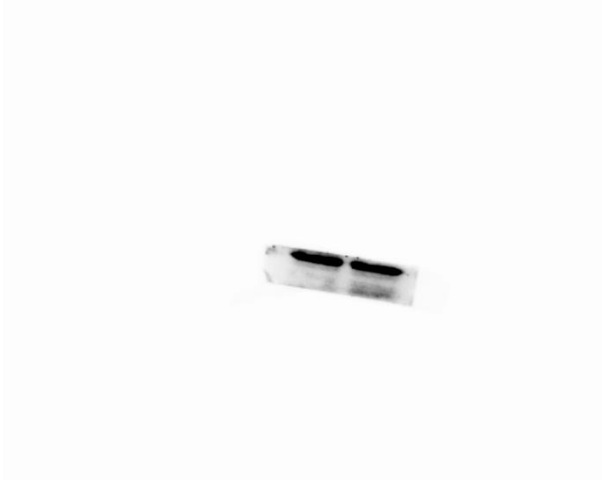

MDM2

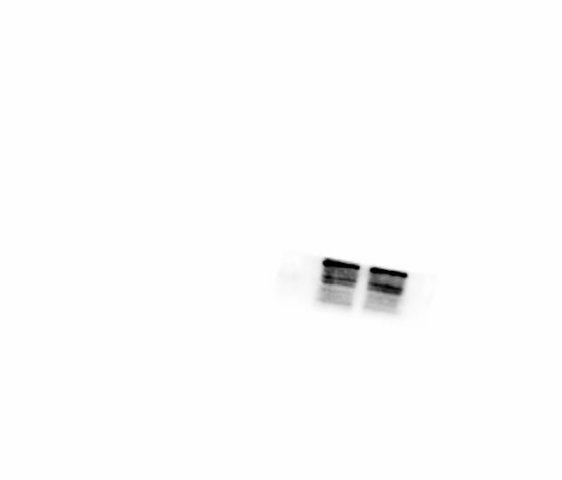

p53

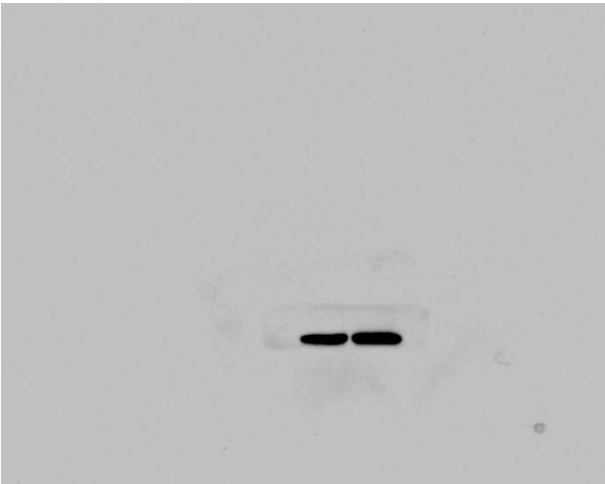

Actin

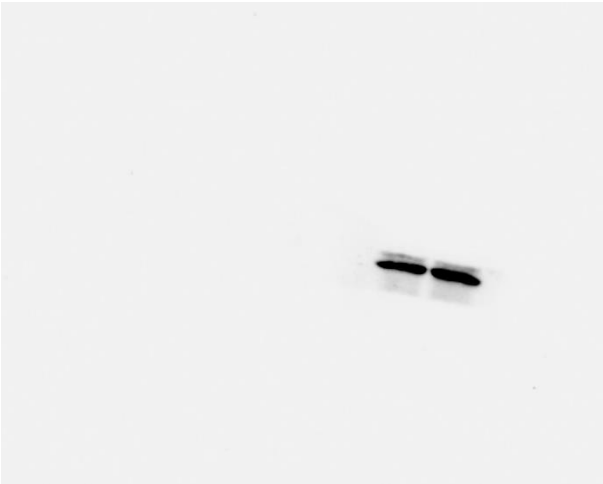

**Supplementary Figure S2F: WB results**  
Repeat 1

IDO1

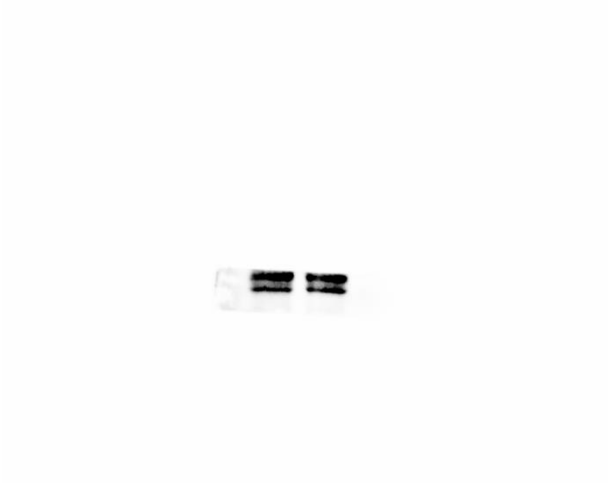

MDM2

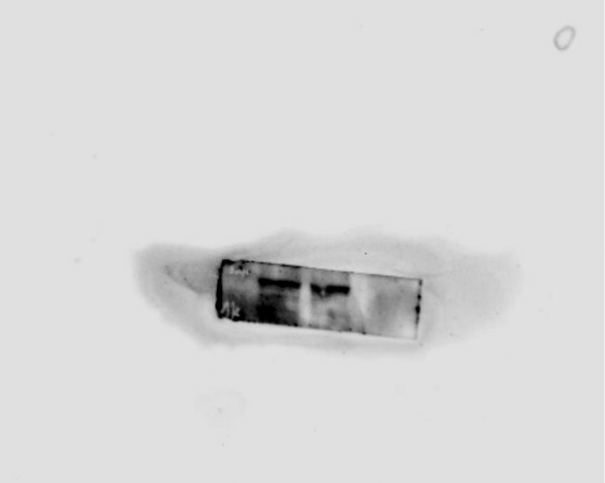

p53

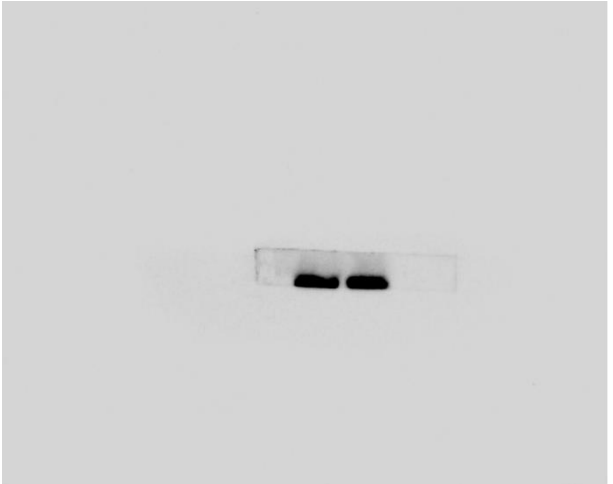

Actin

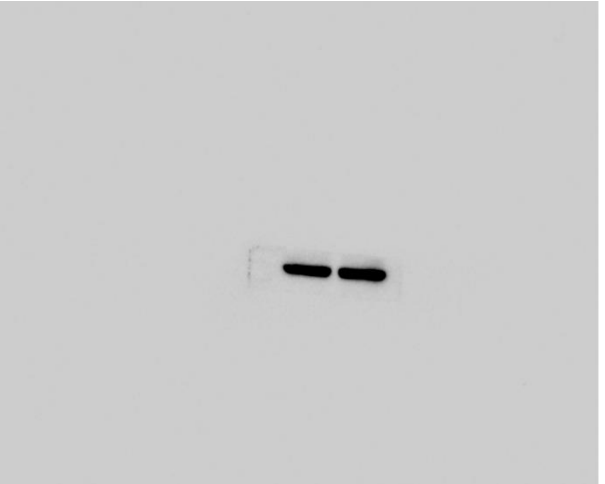

**Supplementary Figure S2F: WB results**  
Repeat 2

IDO1

MDM2

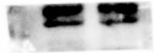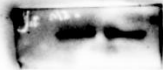

p53

Actin

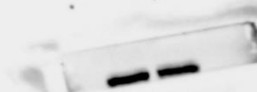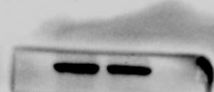



**Supplementary Figure S2F: WB results**  
Repeat 3

IDO1

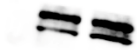

MDM2

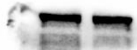

p53

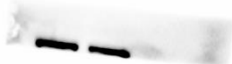

Actin

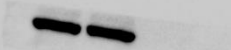

**Supplementary Figure S2I: WB results**  
Repeat 1

BAX

PUMA

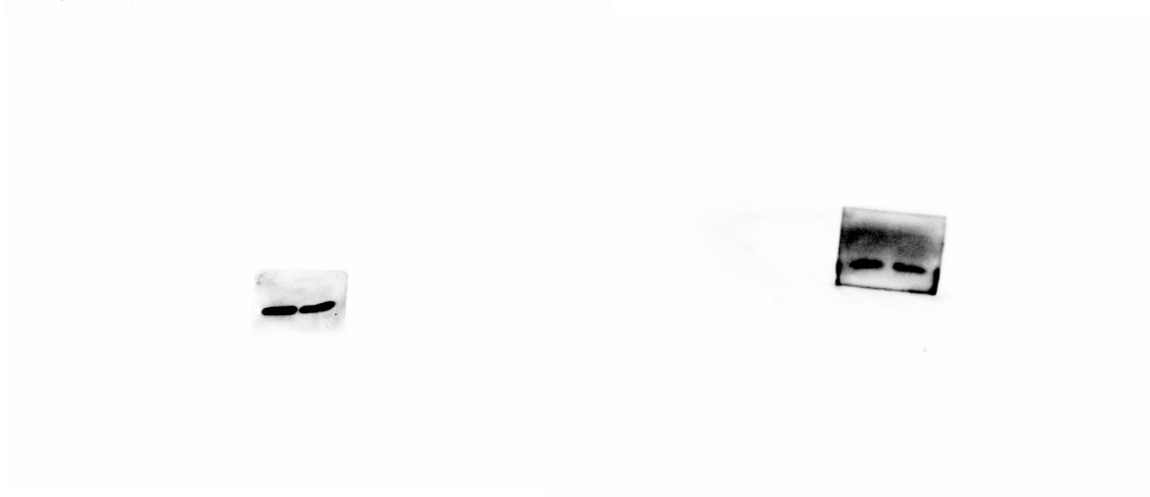

p21

Actin

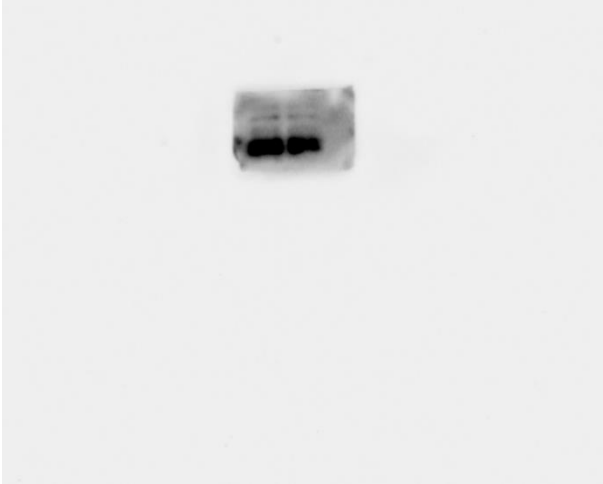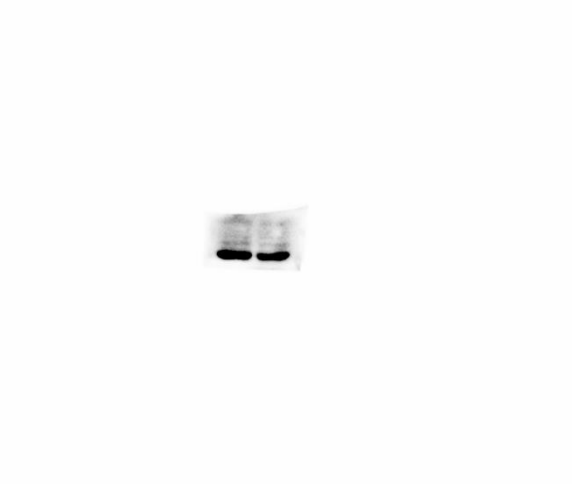

**Supplementary Figure S2I: WB results**

Repeat 2

BAX

PUMA

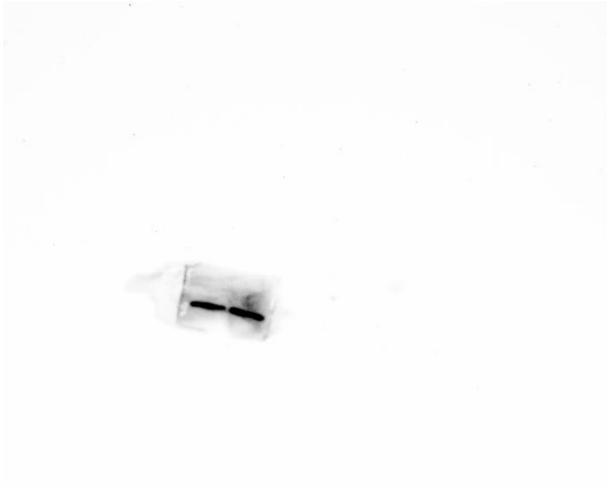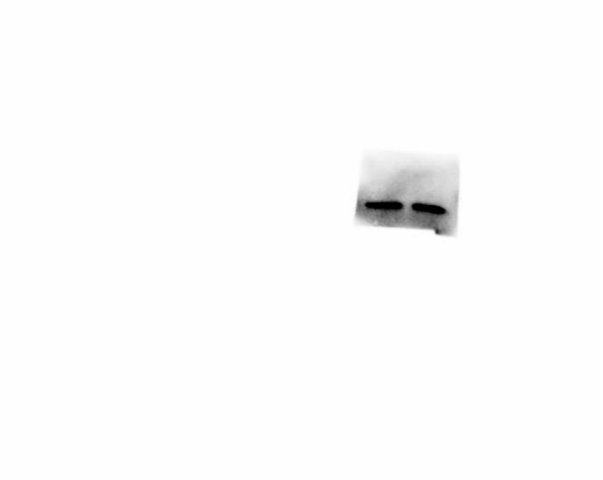

p21

Actin

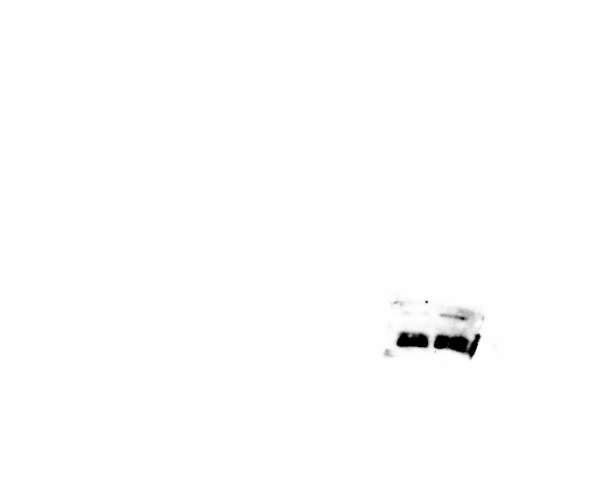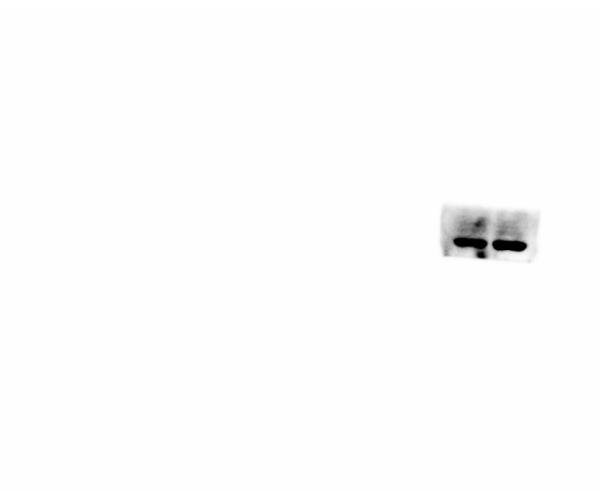

**Supplementary Figure S2I: WB results**  
Repeat 3

BAX

PUMA

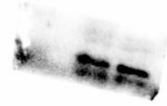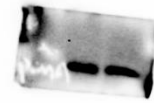

p21

Actin

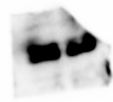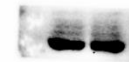

**Supplementary Figure S2J: WB results**  
Repeat 1

BAX

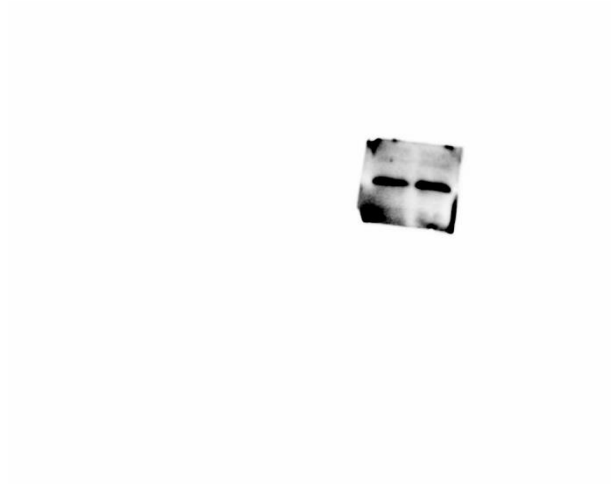

PUMA

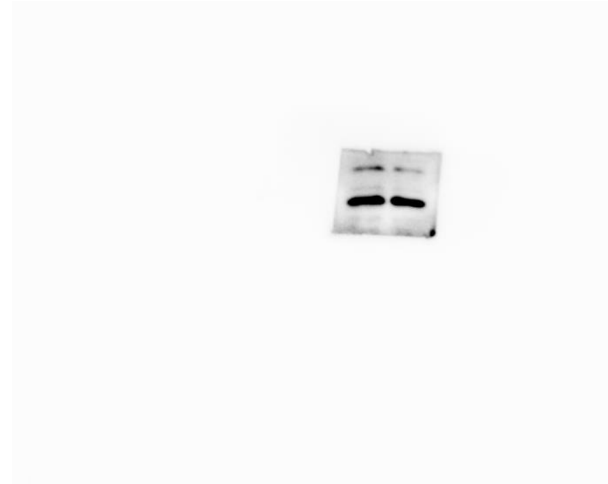

p21

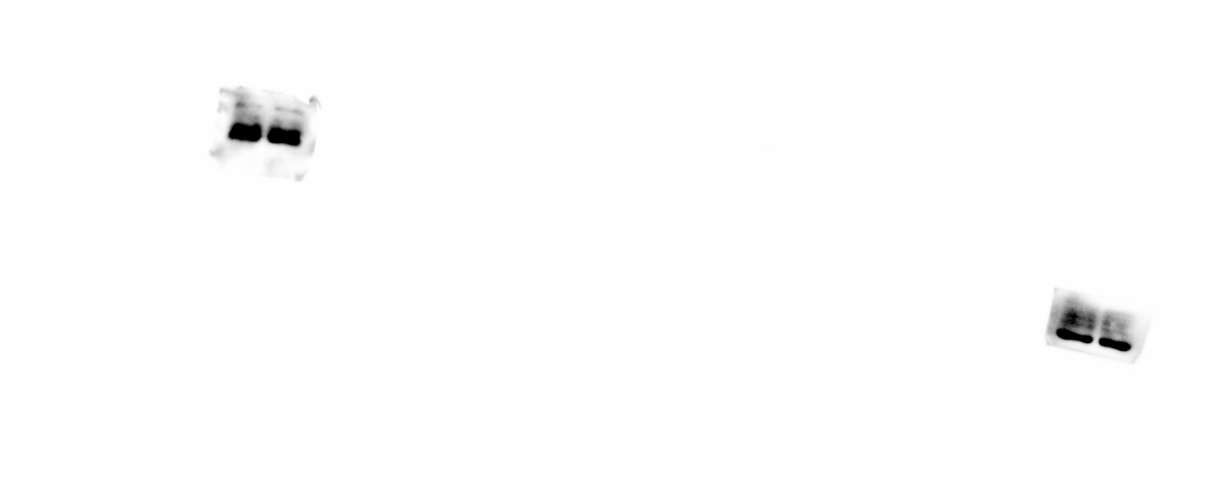

Actin

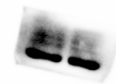

**Supplementary Figure S2J: WB results**  
Repeat 2

BAX

PUMA

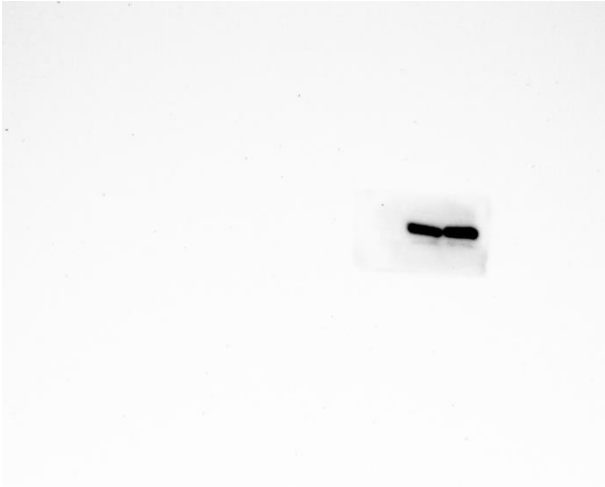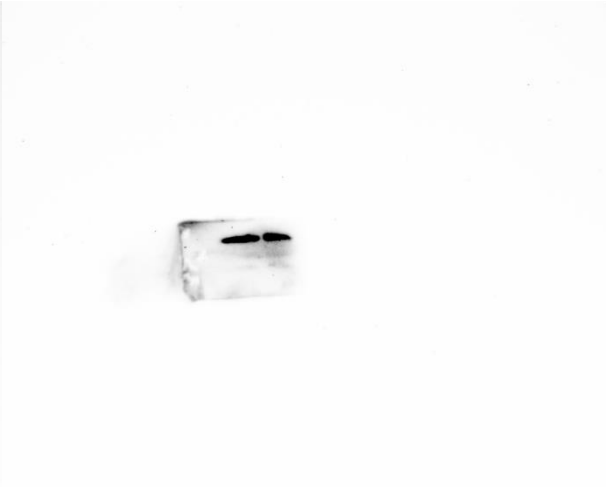

p21

Actin

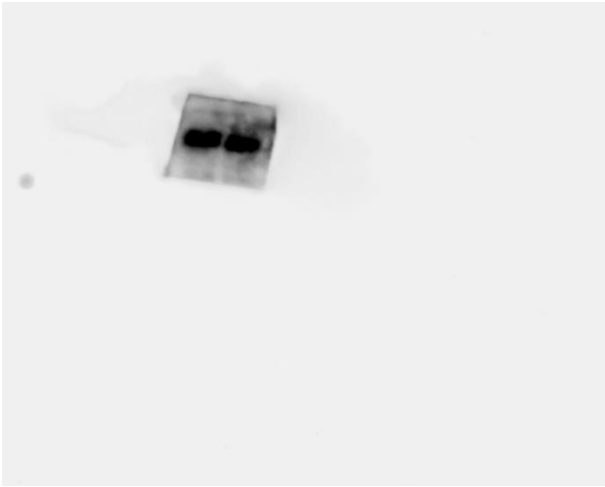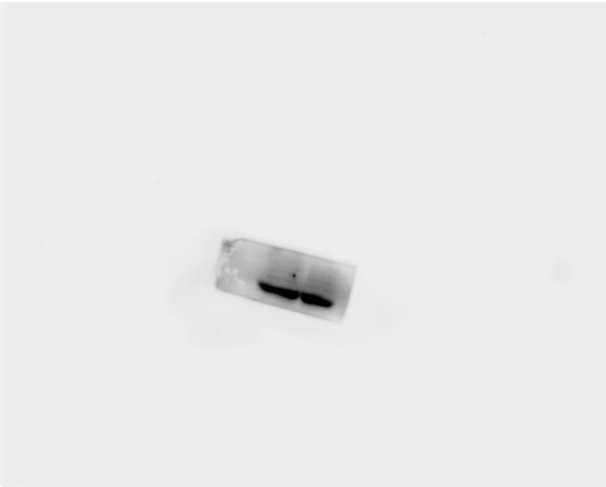

**Supplementary Figure S2J: WB results**  
Repeat 3

BAX

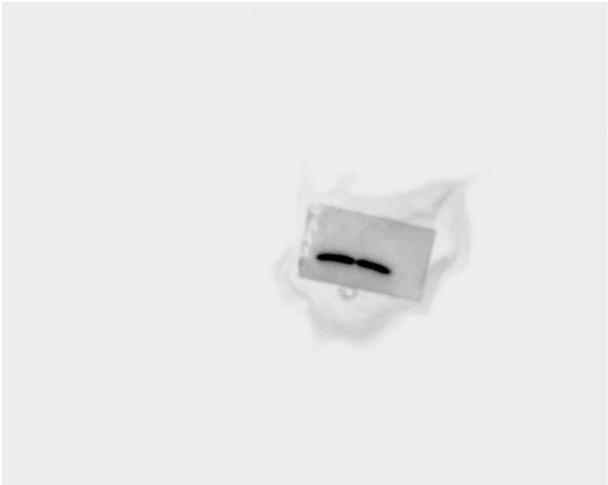

PUMA

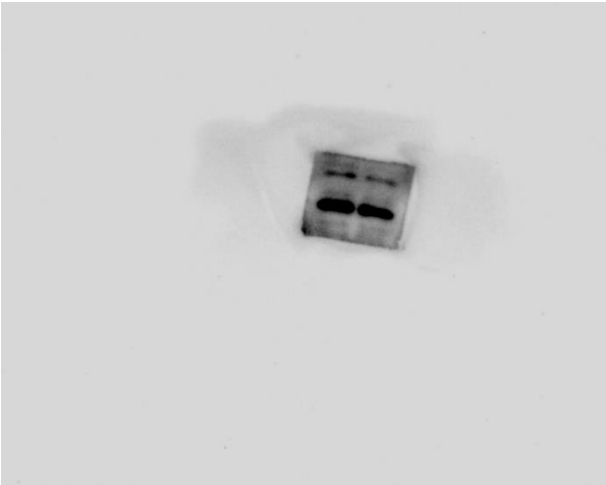

p21

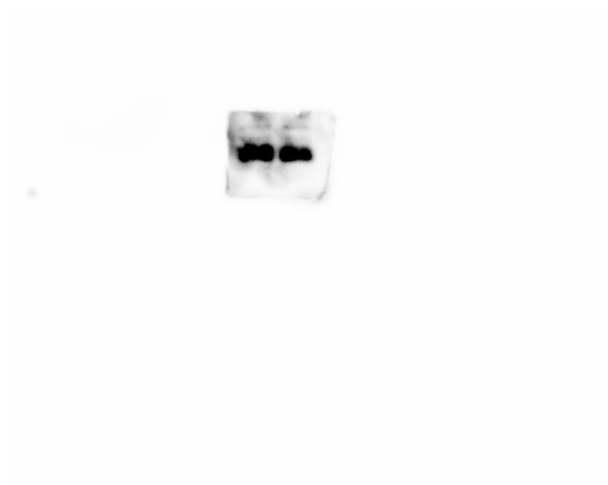

Actin

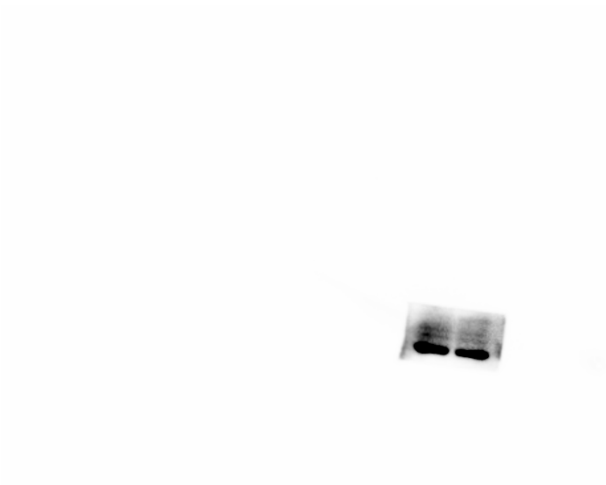

Supplement: 41419_2022_5021_MOESM5_ESM.pdf [file 41419_2022_5021_MOESM5_ESM.pdf]
